# Supplementary material for: Predictors of Junior Versus Senior Elite Performance are Opposite: A Systematic Review and Meta-Analysis of Participation Patterns
Source: Springer Nature journal article supplement (doi:10.1007/s40279-021-01625-4), 2022-01-17
Supplement: MOESM1 [file 20041342]

**Predictors of junior versus senior elite performance are opposite: A systematic review and meta-analysis of participation patterns – Supplementary information**

**Sports Medicine**

Michael Barth<sup>(a)\*</sup>, Arne Güllich<sup>(b)</sup>, Brooke N. Macnamara<sup>(c)</sup>, David Z. Hambrick<sup>(d)</sup>

<sup>(a)</sup> Department of Business & Society  
University of Applied Sciences Kufstein Tirol  
Andreas Hofer-Straße 7  
6330 Kufstein  
Austria

ORCID ID <http://orcid.org/0000-0001-5333-3122>

\* correspondence to Michael Barth: [michael.barth@fh-kufstein.ac.at](mailto:michael.barth@fh-kufstein.ac.at)

<sup>(b)</sup> Department of Sports Science  
University of Technology Kaiserslautern  
Erwin-Schrödinger-Straße 57  
67663 Kaiserslautern  
Germany

ORCID ID <http://orcid.org/0000-0001-6911-2236>

<sup>(c)</sup> Department of Psychological Sciences  
Case Western Reserve University  
11220 Bellflower Road  
Cleveland, OH, 44106  
USA

ORCID ID <https://orcid.org/0000-0003-1056-4996>

<sup>(d)</sup> Department of Psychology  
Michigan State University  
316 Physics Road  
East Lansing, MI, 48825  
USA

ORCID ID <https://orcid.org/0000-0002-5315-5597>

**Tab. S1.** Description and results of the primary studies.

| Ref. N° | Reference                       | Study N° | Age_Cat | Sex | Country  | Sports <sup>(a)</sup>     | Method definition performance | Method data collection | Method data analysis | Published |
|---------|---------------------------------|----------|---------|-----|----------|---------------------------|-------------------------------|------------------------|----------------------|-----------|
| 1       | Baker et al., 2003a             | 1        | Senior  | mf  | AUS      | Game sports: BB, FH, NB   | coach evaluation              | interview              | group comp           | publ      |
| 2       | Baker et al., 2003b             | 2        | Senior  | mf  | AUS      | Game sports: BB, FH, NB   | coach evaluation              | interview              | group comp           | publ      |
| 3       | Baker et al., 2005_s1           | 3        | Senior  | m   | CAN      | Triathlon                 | competition level             | interview              | group comp           | publ      |
| 3       | Baker et al., 2005_s2           | 4        | Senior  | m   | CAN      | Triathlon                 | competition level             | interview              | group comp           | publ      |
| 3       | Baker et al., 2005_s3           | 5        | Senior  | m   | CAN      | Triathlon                 | competition level             | interview              | group comp           | publ      |
| 4       | Baker et al., 2006_s1           | 6        | Senior  | m   | CAN      | Triathlon                 | competition level             | interview              | group comp           | publ      |
| 4       | Baker et al., 2006_s2           | 7        | Senior  | m   | CAN      | Triathlon                 | competition level             | interview              | group comp           | publ      |
| 4       | Baker et al., 2006_s3           | 8        | Senior  | m   | CAN      | Triathlon                 | competition level             | interview              | group comp           | publ      |
| 5       | Baker et al., 2012_s1           | 9        | Junior  | m   | GER      | Handball                  | coach evaluation              | interview              | group comp           | publ      |
| 5       | Baker et al., 2012_s2           | 10       | Junior  | f   | GER      | Handball                  | coach evaluation              | interview              | group comp           | publ      |
| 6       | Barreiros et al., 2013          | 11       | Senior  | mf  | POR      | Multiple sports           | competition level             | interview              | group comp           | publ      |
| 7       | Berry et al., 2008              | 12       | Senior  | m   | AUS      | AUS football              | coach evaluation              | interview              | group comp           | publ      |
| 8       | Bjoerndal et al., 2016_s1       | 13       | Junior  | f   | NOR      | Handball                  | competition level             | questionnaire          | group comp           | publ      |
| 8       | Bjoerndal et al., 2016_s2       | 14       | Junior  | f   | NOR      | Handball                  | competition level             | questionnaire          | group comp           | publ      |
| 8       | Bjoerndal et al., 2016_s3       | 15       | Junior  | f   | NOR      | Handball                  | competition level             | questionnaire          | group comp           | publ      |
| 9       | Bruce et al., 2013              | 16       | Senior  | f   | AUS      | Netball                   | coach evaluation              | questionnaire          | group comp           | publ      |
| 10      | Casado et al., 2019_s1          | 17       | Senior  | m   | ESP, KEN | Athletics (long distance) | competition level             | questionnaire          | group comp           | publ      |
| 10      | Casado et al., 2019_s2          | 18       | Senior  | m   | ESP, KEN | Athletics (long distance) | competition level             | questionnaire          | group comp           | publ      |
| 10      | Casado et al., 2019_s3          | 19       | Senior  | m   | ESP      | Athletics (long distance) | competition level             | questionnaire          | group comp           | publ      |
| 11      | Cathey & French, 2014           | 20       | Senior  | m   | USA      | Baseball (pitchers)       | competition level             | interview              | group comp           | publ      |
| 12      | Cathey, 2010                    | 21       | Senior  | m   | USA      | Baseball (pitchers)       | competition level             | interview              | group comp           | unp       |
| 13      | Coelho-e-Silva et al., 2012     | 22       | Junior  | m   | POR      | Roller hockey             | coach evaluation              | questionnaire          | group comp           | publ      |
| 14      | Coutinho et al., 2014           | 23       | Senior  | mf  | POR      | Volleyball                | competition level             | questionnaire          | group comp           | publ      |
| 15      | Coutinho et al., 2015_s1        | 24       | Senior  | m   | POR      | Volleyball                | competition level             | interview              | group comp           | publ      |
| 15      | Coutinho et al., 2015_s2        | 25       | Senior  | f   | POR      | Volleyball                | competition level             | interview              | group comp           | publ      |
| 16      | Coutinho et al., 2016_s1        | 26       | Senior  | m   | POR      | Volleyball                | competition level             | interview              | group comp           | publ      |
| 16      | Coutinho et al., 2016_s2        | 27       | Senior  | f   | POR      | Volleyball                | competition level             | interview              | group comp           | publ      |
| 17      | Da Matta, 2004                  | 28       | Senior  | f   | BRA      | Volleyball                | coach evaluation              | interview              | group comp           | unp       |
| 18      | Dehghansai et al., 2016         | 29       | Junior  | mf  | CAN      | Wheelchair basketball     | competition level             | questionnaire          | group comp           | unp       |
| 19      | Drake & Breslin, 2017           | 30       | Senior  | f   | IRE      | Field hockey              | coach evaluation              | questionnaire          | group comp           | publ      |
| 20      | Duffy et al., 2004_s1           | 31       | Senior  | m   | GBR      | Dart                      | competition level             | interview              | group comp           | publ      |
| 20      | Duffy et al., 2004_s2           | 32       | Senior  | f   | GBR      | Dart                      | competition level             | interview              | group comp           | publ      |
| 21      | Elferink-Gemser et al., 2004_s1 | 33       | Junior  | f   | NED      | Field hockey              | coach evaluation              | questionnaire          | group comp           | publ      |
| 21      | Elferink-Gemser et al., 2004_s2 | 34       | Junior  | m   | NED      | Field hockey              | coach evaluation              | questionnaire          | group comp           | publ      |
| 22      | Elferink-Gemser et al., 2006_s1 | 35       | Junior  | f   | NED      | Field hockey              | coach evaluation              | questionnaire          | group comp           | publ      |
| 22      | Elferink-Gemser et al., 2006_s2 | 36       | Junior  | m   | NED      | Field hockey              | coach evaluation              | questionnaire          | group comp           | publ      |
| 23      | Elferink-Gemser et al., 2011_s1 | 37       | Junior  | mf  | NED      | Field hockey              | coach evaluation              | questionnaire          | group comp           | publ      |
| 23      | Elferink-Gemser et al., 2011_s2 | 38       | Junior  | mf  | NED      | Field hockey              | coach evaluation              | questionnaire          | group comp           | publ      |

| Ref. N° | Reference                  | Study N° | Age_Cat | Sex  | Country | Sports <sup>(a)</sup> | Method definition performance | Method data collection | Method data analysis | Published |
|---------|----------------------------|----------|---------|------|---------|-----------------------|-------------------------------|------------------------|----------------------|-----------|
| 24      | Erikstad et al., 2018      | 39       | Junior  | m    | NOR     | Soccer                | coach evaluation              | questionnaire          | group comp           | publ      |
| 25      | Ford & Williams, 2012      | 40       | Junior  | m    | GBR     | Soccer                | coach evaluation              | questionnaire          | group comp           | publ      |
| 26      | Ford et al., 2009_s1       | 41       | Junior  | m    | GBR     | Soccer                | coach evaluation              | questionnaire          | group comp           | publ      |
| 26      | Ford et al., 2009_s2       | 42       | Junior  | m    | GBR     | Soccer                | coach evaluation              | questionnaire          | group comp           | publ      |
| 27      | Ford et al., 2010          | 43       | Junior  | m    | GBR     | Cricket (batsmen)     | lab testing                   | questionnaire          | group comp           | publ      |
| 28      | Guimaraes et al., 2019     | 44       | Junior  | m    | POR     | Basketball            | lab testing                   | n.a.                   | correl               | publ      |
| 29      | Güllich & Emrich, 2014_s1  | 45       | Senior  | mf   | GER     | Cgs sports            | competition level             | questionnaire          | group comp           | publ      |
| 29      | Güllich & Emrich, 2014_s10 | 46       | Junior  | mf   | GER     | Other types sports    | competition level             | questionnaire          | group comp           | unp       |
| 29      | Güllich & Emrich, 2014_s11 | 47       | Junior  | mf   | GER     | Cgs sports            | competition level             | questionnaire          | group comp           | unp       |
| 29      | Güllich & Emrich, 2014_s12 | 48       | Junior  | mf   | GER     | Game sports           | competition level             | questionnaire          | group comp           | unp       |
| 29      | Güllich & Emrich, 2014_s13 | 49       | Junior  | mf   | GER     | Combat sports         | competition level             | questionnaire          | group comp           | unp       |
| 29      | Güllich & Emrich, 2014_s14 | 50       | Junior  | mf   | GER     | Art. comp. sports     | competition level             | questionnaire          | group comp           | unp       |
| 29      | Güllich & Emrich, 2014_s15 | 51       | Junior  | mf   | GER     | Other types sports    | competition level             | questionnaire          | group comp           | unp       |
| 29      | Güllich & Emrich, 2014_s2  | 52       | Senior  | mf   | GER     | Game sports           | competition level             | questionnaire          | group comp           | publ      |
| 29      | Güllich & Emrich, 2014_s3  | 53       | Senior  | mf   | GER     | Combat sports         | competition level             | questionnaire          | group comp           | publ      |
| 29      | Güllich & Emrich, 2014_s4  | 54       | Senior  | mf   | GER     | Art. comp. sports     | competition level             | questionnaire          | group comp           | publ      |
| 29      | Güllich & Emrich, 2014_s6  | 55       | Junior  | mf   | GER     | Cgs sports            | competition level             | questionnaire          | group comp           | publ      |
| 29      | Güllich & Emrich, 2014_s7  | 56       | Junior  | mf   | GER     | Game sports           | competition level             | questionnaire          | group comp           | publ      |
| 29      | Güllich & Emrich, 2014_s8  | 57       | Junior  | mf   | GER     | Combat sports         | competition level             | questionnaire          | group comp           | publ      |
| 29      | Güllich & Emrich, 2014_s9  | 58       | Junior  | mf   | GER     | Art. comp. sports     | competition level             | questionnaire          | group comp           | publ      |
| 30      | Güllich et al., 2020       | 59       | Junior  | m    | GER     | Soccer                | competition level             | questionnaire          | correl               | unp       |
| 31      | Güllich, 2014              | 60       | Senior  | m    | GER     | Field hockey          | competition level             | questionnaire          | group comp           | publ      |
| 32      | Güllich, 2017_s1           | 61       | Senior  | mf   | GER     | Cgs sports            | competition level             | questionnaire          | group comp           | publ      |
| 32      | Güllich, 2017_s2           | 62       | Senior  | mf   | GER     | Game sports           | competition level             | questionnaire          | group comp           | publ      |
| 32      | Güllich, 2017_s3           | 63       | Senior  | mf   | GER     | Combat sports         | competition level             | questionnaire          | group comp           | publ      |
| 32      | Güllich, 2017_s4           | 64       | Senior  | mf   | GER     | Art. comp. sports     | competition level             | questionnaire          | group comp           | publ      |
| 32      | Güllich, 2017_s5           | 65       | Senior  | mf   | GER     | Other types sports    | competition level             | questionnaire          | group comp           | publ      |
| 33      | Güllich, 2018a_s1          | 66       | Senior  | mf   | GER     | Athletics             | competition level             | questionnaire          | group comp           | publ      |
| 33      | Güllich, 2018a_s2          | 67       | Senior  | mf   | GER     | Athletics             | competition level             | questionnaire          | group comp           | unp       |
| 33      | Güllich, 2018a_s3          | 68       | Junior  | mf   | GER     | Athletics             | competition level             | questionnaire          | group comp           | publ      |
| 33      | Güllich, 2018a_s4          | 69       | Junior  | mf   | GER     | Athletics             | competition level             | questionnaire          | group comp           | unp       |
| 34      | Güllich, 2019              | 70       | Senior  | f    | GER     | Soccer                | competition level             | questionnaire          | group comp           | publ      |
| 35      | Gunn et al., 2019          | 71       | Senior  | mf   | USA     | Swimming              | competition level             | questionnaire          | correl               | unp       |
| 36      | Hardy et al., 2013         | 72       | Senior  | mf   | GBR     | Multiple sports       | competition level             | interview              | group comp           | unp       |
| 37      | Harris, 2008               | 73       | Senior  | n.a. | USA     | Bowling               | competition level             | questionnaire          | group comp           | unp       |
| 38      | Haugaasen et al., 2014     | 74       | Junior  | m    | NOR     | Soccer                | coach evaluation              | questionnaire          | group comp           | publ      |
| 39      | Helsen et al., 1998_s1     | 75       | Senior  | m    | BEL     | Soccer                | competition level             | questionnaire          | group comp           | publ      |
| 39      | Helsen et al., 1998_s2     | 76       | Senior  | m    | BEL     | Soccer                | competition level             | questionnaire          | group comp           | publ      |

| Ref.<br>N° | Reference                | Study<br>N° | Age_Cat | Sex | Country       | Sports <sup>(a)</sup>   | Method definition<br>performance | Method data<br>collection | Method data<br>analysis | Published |
|------------|--------------------------|-------------|---------|-----|---------------|-------------------------|----------------------------------|---------------------------|-------------------------|-----------|
| 39         | Helsen et al., 1998_s3   | 77          | Senior  | m   | BEL           | Soccer                  | competition level                | questionnaire             | group comp              | publ      |
| 39         | Helsen et al., 1998_s4   | 78          | Senior  | m   | BEL           | Field hockey            | coach evaluation                 | questionnaire             | group comp              | publ      |
| 39         | Helsen et al., 1998_s5   | 79          | Senior  | m   | BEL           | Field hockey            | competition level                | questionnaire             | group comp              | publ      |
| 39         | Helsen et al., 1998_s6   | 80          | Senior  | m   | BEL           | Field hockey            | coach evaluation                 | questionnaire             | group comp              | publ      |
| 40         | Hendry & Hodges, 2018_s1 | 81          | Senior  | m   | GBR           | Soccer                  | coach evaluation                 | questionnaire             | group comp              | publ      |
| 40         | Hendry & Hodges, 2018_s2 | 82          | Junior  | m   | GBR           | Soccer                  | coach evaluation                 | questionnaire             | group comp              | publ      |
| 41         | Hendry et al., 2018_s1   | 83          | Senior  | m   | GBR           | Soccer                  | coach evaluation                 | questionnaire             | correl                  | publ      |
| 41         | Hendry et al., 2018_s2   | 84          | Junior  | m   | GBR           | Soccer                  | coach evaluation                 | questionnaire             | correl                  | publ      |
| 42         | Hendry et al., 2019a     | 85          | Junior  | m   | CAN, GBR      | Soccer                  | coach evaluation                 | questionnaire             | group comp              | publ      |
| 43         | Hendry et al., 2019b     | 86          | Senior  | f   | CAN           | Soccer                  | competition level                | questionnaire             | group comp              | publ      |
| 44         | Hendry, 2012_s1          | 87          | Junior  | m   | GBR           | Soccer                  | coach evaluation                 | questionnaire             | correl                  | unp       |
| 44         | Hendry, 2012_s2          | 88          | Junior  | m   | GBR           | Soccer                  | coach evaluation                 | questionnaire             | correl                  | unp       |
| 44         | Hendry, 2012_s3          | 89          | Junior  | m   | GBR           | Soccer                  | coach evaluation                 | questionnaire             | correl                  | unp       |
| 45         | Hodges et al., 2015      | 90          | Senior  | mf  | CAN           | Triathlon               | competition level                | questionnaire             | correl                  | publ      |
| 46         | Hopwood et al., 2015_s1  | 91          | Senior  | mf  | AUS, CAN      | Multiple sports         | competition level                | questionnaire             | group comp              | publ      |
| 46         | Hopwood et al., 2015_s2  | 92          | Senior  | mf  | AUS, CAN      | Multiple sports         | competition level                | questionnaire             | group comp              | publ      |
| 46         | Hopwood et al., 2015_s3  | 93          | Senior  | mf  | AUS, CAN      | Multiple sports         | competition level                | questionnaire             | group comp              | publ      |
| 47         | Hornig et al., 2016_s1   | 94          | Senior  | m   | GER           | Soccer                  | competition level                | questionnaire             | group comp              | publ      |
| 47         | Hornig et al., 2016_s2   | 95          | Senior  | m   | GER           | Soccer                  | competition level                | questionnaire             | group comp              | publ      |
| 47         | Hornig et al., 2016_s3   | 96          | Senior  | m   | GER           | Soccer                  | competition level                | questionnaire             | group comp              | publ      |
| 48         | Huijgen et al., 2009     | 97          | Senior  | m   | NED           | Soccer                  | coach evaluation                 | n.a.                      | group comp              | publ      |
| 49         | Huijgen et al., 2013     | 98          | Junior  | m   | NED           | Soccer                  | coach evaluation                 | n.a.                      | group comp              | publ      |
| 50         | Hutchinson et al., 2013  | 99          | Junior  | mf  | USA, RUS, MEX | Ballet                  | coach evaluation                 | questionnaire             | correl                  | publ      |
| 51         | Johnson et al., 2006     | 100         | Senior  | mf  | USA           | Swimming                | competition level                | interview                 | group comp              | publ      |
| 52         | Lemez et al., 2020       | 101         | Senior  | mf  | CAN           | Wheelchair basketball   | competition level                | questionnaire             | group comp              | publ      |
| 53         | Low et al., 2017         | 102         | Senior  | m   | MAL           | Badminton               | competition level                | questionnaire             | group comp              | publ      |
| 54         | Maynard et al., 2016     | 103         | Senior  | mf  | USA           | Bowling                 | competition level                | interview                 | correl                  | unp       |
| 55         | Memmert et al., 2010_s1  | 104         | Senior  | mf  | GER           | Game sports: BB, FH, SO | competition level                | questionnaire             | group comp              | publ      |
| 55         | Memmert et al., 2010_s2  | 105         | Senior  | mf  | GER           | Game sports: BB, FH, SO | competition level                | questionnaire             | group comp              | publ      |
| 55         | Memmert et al., 2010_s3  | 106         | Senior  | mf  | GER           | Game sports: BB, FH, SO | competition level                | questionnaire             | group comp              | publ      |
| 56         | Mendes et al., 2018      | 107         | Junior  | m   | BRA           | Volleyball              | coach evaluation                 | questionnaire             | group comp              | publ      |
| 57         | Moesch et al., 2011      | 108         | Senior  | mf  | DEN           | Cgs sports              | competition level                | questionnaire             | group comp              | publ      |
| 58         | Moseid et al., 2019      | 109         | Junior  | mf  | NOR           | Multiple sports         | coach evaluation                 | questionnaire             | group comp              | publ      |
| 59         | Noon et al., 2019        | 110         | Junior  | m   | GBR           | Soccer                  | coach evaluation                 | docu-analysis             | group comp              | publ      |
| 60         | O'Connor et al., 2016    | 111         | Junior  | m   | AUS           | Soccer                  | coach evaluation                 | questionnaire             | group comp              | publ      |
| 61         | Roca et al., 2012_s1     | 112         | Senior  | m   | GBR           | Soccer                  | lab testing                      | questionnaire             | group comp              | publ      |
| 61         | Roca et al., 2012_s2     | 113         | Senior  | m   | GBR           | Soccer                  | lab testing                      | questionnaire             | group comp              | publ      |
| 61         | Roca et al., 2012_s3     | 114         | Senior  | m   | GBR           | Soccer                  | lab testing                      | questionnaire             | group comp              | publ      |

| Ref.<br>N° | Reference                      | Study<br>N° | Age_Cat | Sex | Country       | Sports <sup>(a)</sup>       | Method definition<br>performance | Method data<br>collection | Method data<br>analysis | Published |
|------------|--------------------------------|-------------|---------|-----|---------------|-----------------------------|----------------------------------|---------------------------|-------------------------|-----------|
| 62         | San & Lee, 2014                | 115         | Junior  | mf  | MAL           | Swimming                    | competition level                | questionnaire             | group comp              | publ      |
| 63         | Sawai et al., 2018             | 116         | Senior  | f   | JAP           | Multiple sports             | competition level                | questionnaire             | group comp              | publ      |
| 64         | Sigmund & Güllich, 2020_s1     | 117         | Senior  | mf  | GER           | Athletics, volleyball       | competition level                | questionnaire             | group comp              | unp       |
| 64         | Sigmund & Güllich, 2020_s2     | 118         | Junior  | mf  | GER           | Athletics, volleyball       | competition level                | questionnaire             | group comp              | unp       |
| 65         | Smith, 2012                    | 119         | Senior  | f   | USA           | Basketball                  | competition level                | questionnaire             | group comp              | unp       |
| 66         | Toering et al., 2009           | 120         | Junior  | m   | NED           | Soccer                      | competition level                | questionnaire             | group comp              | publ      |
| 67         | Urena, 2004                    | 121         | Junior  | f   | USA, MEX, RUS | Ballet                      | coach evaluation                 | questionnaire             | correl                  | unp       |
| 68         | Ward et al., 2007              | 122         | Junior  | m   | GBR           | Soccer                      | competition level                | questionnaire             | group comp              | publ      |
| 69         | Weissensteiner et al., 2008_s1 | 123         | Senior  | m   | AUS           | Cricket (batsmen)           | coach evaluation                 | interview                 | group comp              | publ      |
| 69         | Weissensteiner et al., 2008_s2 | 124         | Junior  | m   | AUS           | Cricket (batsmen)           | coach evaluation                 | interview                 | group comp              | publ      |
| 69         | Weissensteiner et al., 2008_s3 | 125         | Junior  | m   | AUS           | Cricket (batsmen)           | coach evaluation                 | interview                 | group comp              | publ      |
| 70         | Williams et al., 2012_s1       | 126         | Junior  | m   | GBR           | Soccer                      | competition level                | questionnaire             | correl                  | publ      |
| 70         | Williams et al., 2012_s2       | 127         | Junior  | m   | GBR           | Soccer                      | competition level                | questionnaire             | group comp              | publ      |
| 70         | Williams et al., 2012_s3       | 128         | Junior  | m   | GBR           | Soccer                      | competition level                | questionnaire             | group comp              | publ      |
| 71         | Young & Salmela, 2010_s1       | 129         | Junior  | m   | CAN           | Athletics (middle distance) | competition level                | questionnaire             | group comp              | publ      |
| 71         | Young & Salmela, 2010_s2       | 130         | Junior  | m   | CAN           | Athletics (middle distance) | competition level                | questionnaire             | group comp              | publ      |
| 71         | Young & Salmela, 2010_s3       | 131         | Junior  | m   | CAN           | Athletics (middle distance) | competition level                | questionnaire             | group comp              | publ      |

<sup>(a)</sup> BB = basketball, FH = field hockey,  
NB = netball, SO = soccer

| Ref.<br>N <sup>o</sup> | Reference                       | Study<br>N <sup>o</sup> | Performance<br>level high <sup>(b)</sup> | Performance |                          |      |     | Bandwidth | d perf<br>milestones <sup>(c)</sup> | d MSPr<br>start | d MSPr | d MSPI | d OSPrPI | d OSPr | d OSPI |
|------------------------|---------------------------------|-------------------------|------------------------------------------|-------------|--------------------------|------|-----|-----------|-------------------------------------|-----------------|--------|--------|----------|--------|--------|
|                        |                                 |                         |                                          | HP n        | level low <sup>(b)</sup> | LP n | N   |           |                                     |                 |        |        |          |        |        |
| 1                      | Baker et al., 2003a             | 1                       | WCI                                      | 15          | RCI_bRCI                 | 13   | 28  | extreme   |                                     |                 | 1.079  |        |          |        |        |
| 2                      | Baker et al., 2003b             | 2                       | WCI                                      | 15          | RCI_bRCI                 | 13   | 28  | extreme   |                                     |                 | 1.140  | -0.540 |          |        |        |
| 3                      | Baker et al., 2005_s1           | 3                       | bRCI_high                                | 9           | bRCI_low                 | 9    | 18  | narrow    |                                     |                 | 0.755  |        | 0.321    |        |        |
| 3                      | Baker et al., 2005_s2           | 4                       | NCI                                      | 9           | bRCI_high                | 9    | 18  | medium    |                                     |                 | 1.926  |        | 0.913    |        |        |
| 3                      | Baker et al., 2005_s3           | 5                       | NCI                                      | 9           | bRCI_low                 | 9    | 18  | extreme   |                                     |                 | 2.977  |        | 1.236    |        |        |
| 4                      | Baker et al., 2006_s1           | 6                       | bRCI_high                                | 6           | bRCI_low                 | 6    | 12  | narrow    |                                     |                 | 0.236  |        | 0.312    |        |        |
| 4                      | Baker et al., 2006_s2           | 7                       | NCI                                      | 6           | bRCI_high                | 6    | 12  | medium    |                                     |                 | 2.595  |        | 0.808    |        |        |
| 4                      | Baker et al., 2006_s3           | 8                       | NCI                                      | 6           | bRCI_low                 | 6    | 12  | extreme   |                                     |                 | 2.260  |        | 1.044    |        |        |
| 5                      | Baker et al., 2012_s1           | 9                       | NCI_high                                 | 19          | NCI_low                  | 24   | 43  | narrow    |                                     |                 | 0.187  |        | 0.322    |        |        |
| 5                      | Baker et al., 2012_s2           | 10                      | NCI_high                                 | 46          | NCI_low                  | 40   | 86  | narrow    |                                     |                 | -0.186 |        | 0.513    |        |        |
| 6                      | Barreiros et al., 2013          | 11                      | NCI_high                                 | 21          | NCI_low_RCI              | 21   | 42  | medium    | 3.396                               | 0.069           | -0.036 | -0.017 | 0.332    | 0.323  | 0.340  |
| 7                      | Berry et al., 2008              | 12                      | NCI_high                                 | 17          | NCI_low                  | 15   | 32  | narrow    | -0.412                              | -0.051          | 0.620  | 1.060  | 0.415    | 0.470  | 0.360  |
| 8                      | Bjoerndal et al., 2016_s1       | 13                      | NCI                                      | 21          | RCI_high                 | 6    | 27  | narrow    |                                     |                 | 0.634  |        |          |        |        |
| 8                      | Bjoerndal et al., 2016_s2       | 14                      | NCI                                      | 21          | RCI_low                  | 6    | 27  | medium    |                                     |                 | 4.984  |        |          |        |        |
| 8                      | Bjoerndal et al., 2016_s3       | 15                      | RCI_high                                 | 6           | RCI_low                  | 6    | 12  | narrow    |                                     |                 | 2.215  |        |          |        |        |
| 9                      | Bruce et al., 2013              | 16                      | WCI                                      | 19          | bRCI                     | 18   | 37  | extreme   |                                     | 1.082           | 1.429  |        | -0.055   | -0.145 | 0.036  |
| 10                     | Casado et al., 2019_s1          | 17                      | WCI                                      | 19          | NCI_high                 | 18   | 37  | narrow    |                                     | 0.889           |        |        |          |        |        |
| 10                     | Casado et al., 2019_s2          | 18                      | WCI                                      | 19          | NCI_low                  | 18   | 37  | narrow    |                                     | 1.860           |        |        |          |        |        |
| 10                     | Casado et al., 2019_s3          | 19                      | NCI_high                                 | 18          | NCI_low                  | 18   | 36  | narrow    |                                     | 0.870           |        |        |          |        |        |
| 11                     | Cathey & French, 2014           | 20                      | RCI                                      | 9           | bRCI                     | 9    | 18  | narrow    |                                     | 0.889           |        |        |          |        |        |
| 12                     | Cathey, 2010                    | 21                      | RCI                                      | 11          | bRCI                     | 10   | 21  | narrow    |                                     | 0.851           | 0.521  |        |          |        |        |
| 13                     | Coelho-e-Silva et al., 2012     | 22                      | WCI                                      | 32          | RCI                      | 41   | 73  | medium    |                                     | 0.682           |        |        |          |        |        |
| 14                     | Coutinho et al., 2014           | 23                      | NCI                                      | 140         | RCI                      | 89   | 229 | narrow    |                                     | 0.275           | 0.647  |        | 0.068    |        |        |
| 15                     | Coutinho et al., 2015_s1        | 24                      | NCI                                      | 15          | RCI                      | 15   | 30  | narrow    |                                     | 0.000           | 1.243  |        | 2.476    | 2.476  |        |
| 15                     | Coutinho et al., 2015_s2        | 25                      | NCI                                      | 15          | RCI                      | 15   | 30  | narrow    |                                     | 0.297           | 1.017  |        | 0.280    | 0.280  |        |
| 16                     | Coutinho et al., 2016_s1        | 26                      | NCI                                      | 15          | bRCI                     | 15   | 30  | extreme   |                                     |                 |        |        | 0.445    | 0.734  | 0.155  |
| 16                     | Coutinho et al., 2016_s2        | 27                      | NCI                                      | 15          | bRCI                     | 15   | 30  | extreme   |                                     |                 |        |        | -0.051   | 0.054  | -0.156 |
| 17                     | Da Matta, 2004                  | 28                      | WCI                                      | 10          | bRCI                     | 10   | 20  | extreme   |                                     | 0.162           | 1.183  |        |          |        |        |
| 18                     | Dehghansai et al., 2016         | 29                      | NCI_high                                 | 22          | NCL_low                  | 26   | 48  | narrow    |                                     | 0.850           |        |        |          |        |        |
| 19                     | Drake & Breslin, 2017           | 30                      | NCI_high                                 | 11          | NCI_low                  | 12   | 23  | narrow    | -1.160                              | -0.513          | 0.772  | 0.492  | 0.268    |        |        |
| 20                     | Duffy et al., 2004_s1           | 31                      | WCI                                      | 12          | bRCI                     | 12   | 24  | extreme   |                                     |                 | 1.348  | 0.142  |          |        |        |
| 20                     | Duffy et al., 2004_s2           | 32                      | WCI                                      | 6           | bRCI                     | 6    | 12  | extreme   |                                     |                 | 1.526  | 1.817  |          |        |        |
| 21                     | Elferink-Gemser et al., 2004_s1 | 33                      | NCI_high                                 | 17          | NCI_low                  | 46   | 63  | narrow    |                                     |                 | 0.965  |        |          |        |        |
| 21                     | Elferink-Gemser et al., 2004_s2 | 34                      | NCI_high                                 | 21          | NCI_low                  | 42   | 63  | narrow    |                                     |                 | 1.523  |        |          |        |        |
| 22                     | Elferink-Gemser et al., 2006_s1 | 35                      | NCI_high                                 | 15          | NCI_low                  | 18   | 33  | narrow    |                                     |                 | 0.512  |        |          |        |        |
| 22                     | Elferink-Gemser et al., 2006_s2 | 36                      | NCI_high                                 | 15          | NCI_low                  | 17   | 32  | narrow    |                                     |                 | 1.179  |        |          |        |        |
| 23                     | Elferink-Gemser et al., 2011_s1 | 37                      | NCI_high                                 | 31          | NCI_low                  | 66   | 97  | narrow    |                                     |                 | 0.290  |        |          |        |        |
| 23                     | Elferink-Gemser et al., 2011_s2 | 38                      | NCI_high                                 | 32          | NCI_low                  | 95   | 127 | narrow    |                                     |                 | 0.450  |        |          |        |        |

| Ref.<br>N° | Reference                  | Study<br>N° | Performance<br>level high <sup>(b)</sup> | Performance |                          |      |     | d perf<br>milestones <sup>(c)</sup> | d MSPr    |        |        |        |          |        |        |
|------------|----------------------------|-------------|------------------------------------------|-------------|--------------------------|------|-----|-------------------------------------|-----------|--------|--------|--------|----------|--------|--------|
|            |                            |             |                                          | HP n        | level low <sup>(b)</sup> | LP n | N   |                                     | Bandwidth | start  | d MSPr | d MSPI | d OSPrPI | d OSPr | d OSPI |
| 24         | Erikstad et al., 2018      | 39          | NCI                                      | 105         | RCI                      | 410  | 515 | narrow                              |           |        | 0.088  | -0.004 |          |        |        |
| 25         | Ford & Williams, 2012      | 40          | NCI                                      | 16          | RCI                      | 16   | 32  | narrow                              | -0.180    | -0.615 | 0.455  | 0.645  | 0.063    |        |        |
| 26         | Ford et al., 2009_s1       | 41          | NCI_high                                 | 11          | NCI_low                  | 11   | 22  | narrow                              | 0.300     | -0.107 | -0.400 | 0.800  | -0.300   |        |        |
| 26         | Ford et al., 2009_s2       | 42          | NCI                                      | 22          | bRCI                     | 11   | 33  | extreme                             |           | 0.000  | 1.500  | 0.400  | -0.700   |        |        |
| 27         | Ford et al., 2010          | 43          | NCI_high                                 | 15          | NCI_low                  | 15   | 30  | narrow                              | 0.210     | -0.015 | 0.870  | 0.603  | 0.430    |        |        |
| 28         | Guimaraes et al., 2019     | 44          | NCI                                      | 75          | RCI                      | 75   | 150 | narrow                              |           |        | 0.799  |        |          |        |        |
| 29         | Güllich & Emrich, 2014_s1  | 45          | WCI                                      | 208         | NCI                      | 97   | 305 | narrow                              | 0.287     | 0.303  | -0.011 |        | 0.193    | 0.319  | 0.067  |
| 29         | Güllich & Emrich, 2014_s10 | 46          | WCI_NCI_high                             | 46          | NCI_low                  | 75   | 121 | medium                              | -0.882    | -0.823 | 0.712  |        | -0.125   | 0.093  | -0.343 |
| 29         | Güllich & Emrich, 2014_s11 | 47          | WCI                                      | 20          | NCI                      | 314  | 334 | narrow                              | -0.603    | -0.254 | 0.273  |        | -0.089   | -0.165 | -0.012 |
| 29         | Güllich & Emrich, 2014_s12 | 48          | WCI                                      | 18          | NCI                      | 148  | 166 | narrow                              | -0.899    | -0.095 | 0.802  |        | -0.199   | -0.189 | -0.210 |
| 29         | Güllich & Emrich, 2014_s13 | 49          | WCI                                      | 7           | NCI                      | 86   | 93  | narrow                              | -0.320    | 0.516  | -0.256 |        | -0.037   | -0.108 | 0.033  |
| 29         | Güllich & Emrich, 2014_s14 | 50          | WCI                                      | 16          | NCI                      | 75   | 91  | narrow                              | -0.607    | -0.348 | -0.041 |        | -0.351   | -0.236 | -0.466 |
| 29         | Güllich & Emrich, 2014_s15 | 51          | WCI                                      | 8           | NCI                      | 62   | 70  | narrow                              | -0.441    | -0.348 | 1.123  |        | -0.304   | -0.291 | -0.318 |
| 29         | Güllich & Emrich, 2014_s2  | 52          | WCI                                      | 73          | NCI                      | 44   | 117 | narrow                              | 0.013     | 0.138  | -0.350 |        | 0.340    | 0.380  | 0.299  |
| 29         | Güllich & Emrich, 2014_s3  | 53          | WCI                                      | 40          | NCI                      | 24   | 64  | narrow                              | 0.480     | 0.475  | -0.088 |        | 0.344    | 0.362  | 0.326  |
| 29         | Güllich & Emrich, 2014_s4  | 54          | WCI                                      | 20          | NCI                      | 24   | 44  | narrow                              | 0.940     | 0.399  | 0.396  |        | 0.094    | 0.331  | -0.143 |
| 29         | Güllich & Emrich, 2014_s6  | 55          | WCI_NCI_high                             | 220         | NCI_low                  | 337  | 557 | medium                              | -0.689    | -0.933 | 1.116  |        | -0.252   | -0.309 | -0.196 |
| 29         | Güllich & Emrich, 2014_s7  | 56          | WCI_NCI_high                             | 91          | NCI_low                  | 139  | 230 | medium                              | -0.698    | -0.511 | 0.425  |        | -0.180   | -0.215 | -0.144 |
| 29         | Güllich & Emrich, 2014_s8  | 57          | WCI_NCI_high                             | 59          | NCI_low                  | 51   | 110 | medium                              | -0.578    | -0.516 | 0.443  |        | -0.202   | -0.217 | -0.188 |
| 29         | Güllich & Emrich, 2014_s9  | 58          | WCI_NCI_high                             | 77          | NCI_low                  | 20   | 97  | medium                              | -0.254    | -0.523 | 0.277  |        | -0.233   | -0.551 | 0.084  |
| 30         | Güllich et al., 2020       | 59          | RCI_high                                 | 50          | RCI_low                  | 50   | 100 | narrow                              | -0.215    | -0.318 | 0.916  | 0.161  | -0.029   | -0.140 | 0.082  |
| 31         | Güllich, 2014              | 60          | WCI                                      | 16          | NCI                      | 19   | 35  | narrow                              | 0.830     | -0.365 | -0.523 | -0.099 | 0.613    | 0.755  | 0.470  |
| 32         | Güllich, 2017_s1           | 61          | WCI                                      | 44          | NCI                      | 44   | 88  | narrow                              | 0.286     | 0.542  | -0.885 |        | 0.524    | 0.878  | 0.169  |
| 32         | Güllich, 2017_s2           | 62          | WCI                                      | 12          | NCI                      | 12   | 24  | narrow                              | -0.095    | 0.232  | -0.769 |        | 0.525    | 0.506  | 0.543  |
| 32         | Güllich, 2017_s3           | 63          | WCI                                      | 8           | NCI                      | 8    | 16  | narrow                              | 0.000     | 1.196  | -1.614 |        | 0.675    | 1.619  | -0.270 |
| 32         | Güllich, 2017_s4           | 64          | WCI                                      | 5           | NCI                      | 5    | 10  | narrow                              | 0.230     | 1.355  | -0.845 |        | 0.149    | 0.740  | -0.443 |
| 32         | Güllich, 2017_s5           | 65          | WCI                                      | 14          | NCI                      | 14   | 28  | narrow                              | -0.060    | 0.120  | -0.961 |        | 0.616    | 1.244  | -0.012 |
| 33         | Güllich, 2018a_s1          | 66          | WCI_NCI_high                             | 40          | NCI_low                  | 40   | 80  | narrow                              | 1.304     | 0.349  | -0.209 | -0.371 | 0.471    | 0.876  | 0.009  |
| 33         | Güllich, 2018a_s2          | 67          | WCI                                      | 17          | NCI                      | 17   | 34  | narrow                              | 1.493     | 0.440  | -0.168 | -0.671 | 0.445    | 1.154  | -0.364 |
| 33         | Güllich, 2018a_s3          | 68          | WCI_NCI_high                             | 69          | NCI_low                  | 69   | 138 | narrow                              | -0.297    | 0.083  | 0.355  | -0.023 | 0.072    | 0.090  | 0.051  |
| 33         | Güllich, 2018a_s4          | 69          | WCI                                      | 23          | NCI                      | 23   | 46  | narrow                              | -0.707    | 0.084  | 0.415  | 0.028  | 0.005    | -0.008 | 0.020  |
| 34         | Güllich, 2019              | 70          | WCI                                      | 14          | NCI                      | 15   | 29  | narrow                              | 0.884     | 0.708  | -0.619 | 0.818  | 0.399    | 0.842  | -0.017 |
| 35         | Gunn et al., 2019          | 71          | NCI                                      | 13          | RCI                      | 17   | 30  | narrow                              |           |        | -0.654 |        | 0.407    | 0.407  |        |
| 36         | Hardy et al., 2013         | 72          | WCI                                      | 16          | NCI                      | 16   | 32  | narrow                              | 0.852     | 0.510  | 0.323  | 0.033  | 0.341    | 0.282  | 0.400  |
| 37         | Harris, 2008               | 73          | RCI                                      | 16          | bRCI                     | 16   | 32  | narrow                              |           | 0.319  | 0.904  | 0.633  |          |        |        |
| 38         | Haugaasen et al., 2014     | 74          | NCI                                      | 81          | RCI                      | 462  | 543 | narrow                              |           | -0.060 | 0.240  |        |          |        |        |
| 39         | Helsen et al., 1998_s1     | 75          | NCI                                      | 17          | RCI_high                 | 21   | 38  | narrow                              |           |        | 0.743  |        |          |        |        |
| 39         | Helsen et al., 1998_s2     | 76          | RCI_high                                 | 21          | RCI_low                  | 35   | 56  | narrow                              |           |        | 1.059  |        |          |        |        |

| Ref.<br>N° | Reference                | Study<br>N° | Performance<br>level high <sup>(b)</sup> | Performance |                          |      |     | d perf<br>milestones <sup>(c)</sup> | d MSPr<br>start | d MSPr | d MSPI | d OSPrPI | d OSPr | d OSPI |           |
|------------|--------------------------|-------------|------------------------------------------|-------------|--------------------------|------|-----|-------------------------------------|-----------------|--------|--------|----------|--------|--------|-----------|
|            |                          |             |                                          | HP n        | level low <sup>(b)</sup> | LP n | N   |                                     |                 |        |        |          |        |        | Bandwidth |
| 39         | Helsen et al., 1998_s3   | 77          | NCI                                      | 17          | RCI_low                  | 35   | 52  | extreme                             |                 | 1.731  |        |          |        |        |           |
| 39         | Helsen et al., 1998_s4   | 78          | NCI_high                                 | 16          | NCI_low                  | 18   | 34  | narrow                              |                 | -0.055 |        |          |        |        |           |
| 39         | Helsen et al., 1998_s5   | 79          | NCI_low                                  | 18          | RCI                      | 17   | 35  | narrow                              |                 | 0.792  |        |          |        |        |           |
| 39         | Helsen et al., 1998_s6   | 80          | NCI_high                                 | 16          | RCI                      | 17   | 33  | extreme                             |                 | 0.804  |        |          |        |        |           |
| 40         | Hendry & Hodges, 2018_s1 | 81          | NCI                                      | 9           | RCI                      | 17   | 26  | narrow                              | -0.070          | -0.180 | -0.124 | 2.020    | 0.047  |        |           |
| 40         | Hendry & Hodges, 2018_s2 | 82          | NCI                                      | 26          | RCI                      | 76   | 102 | narrow                              | -1.040          | -0.230 | 0.600  | 0.190    | -0.150 |        |           |
| 41         | Hendry et al., 2018_s1   | 83          | NCI                                      | 9           | RCI                      | 17   | 26  | narrow                              |                 | 0.673  | 0.282  |          |        |        |           |
| 41         | Hendry et al., 2018_s2   | 84          | NCI                                      | 26          | RCI                      | 76   | 102 | narrow                              |                 | 0.018  | -0.133 |          |        |        |           |
| 42         | Hendry et al., 2019a     | 85          | NCI                                      | 31          | RCI                      | 32   | 63  | narrow                              |                 | -0.337 | 1.205  | 1.730    | -1.430 |        |           |
| 43         | Hendry et al., 2019b     | 86          | WCI                                      | 21          | RCI                      | 24   | 45  | medium                              | 0.739           | 0.780  | 0.410  | 1.463    | 0.273  |        |           |
| 44         | Hendry, 2012_s1          | 87          | NCI_h_to_NCI_low                         | 48          |                          |      | 48  | narrow                              |                 | 0.814  | -0.341 |          |        |        |           |
| 44         | Hendry, 2012_s2          | 88          | NCI_h_to_NCI_low                         | 50          |                          |      | 50  | narrow                              |                 | 0.385  | 0.064  |          |        |        |           |
| 44         | Hendry, 2012_s3          | 89          | NCI_h_to_NCI_low                         | 46          |                          |      | 46  | narrow                              |                 | 0.108  | 0.042  |          |        |        |           |
| 45         | Hodges et al., 2015      | 90          | RCI_to_bRCI                              | 90          |                          |      | 90  | narrow                              |                 | 0.539  |        |          |        |        |           |
| 46         | Hopwood et al., 2015_s1  | 91          | NCI_high                                 | 122         | NCI_low                  | 32   | 154 | narrow                              |                 | -0.001 |        |          |        |        |           |
| 46         | Hopwood et al., 2015_s2  | 92          | NCI_low                                  | 32          | RCI_bRCI                 | 55   | 87  | medium                              |                 | 0.047  |        |          |        |        |           |
| 46         | Hopwood et al., 2015_s3  | 93          | NCI_high                                 | 122         | RCI_bRCI                 | 55   | 177 | extreme                             |                 | 0.047  |        |          |        |        |           |
| 47         | Hornig et al., 2016_s1   | 94          | WCI                                      | 18          | NCI                      | 34   | 52  | narrow                              | 0.259           | -0.524 | -0.266 | 0.038    | 0.272  | 0.386  | 0.158     |
| 47         | Hornig et al., 2016_s2   | 95          | NCI                                      | 34          | RCI                      | 50   | 84  | narrow                              | 0.544           | 0.215  | 0.516  | 0.099    | -0.048 | -0.049 | -0.046    |
| 47         | Hornig et al., 2016_s3   | 96          | WCI                                      | 18          | RCI                      | 50   | 68  | extreme                             | 0.937           | -0.290 | 0.295  | 0.155    | 0.227  | 0.348  | 0.105     |
| 48         | Huijgen et al., 2009     | 97          | NCI                                      | 11          | RCI                      | 15   | 26  | narrow                              |                 | 0.649  |        |          |        |        |           |
| 49         | Huijgen et al., 2013     | 98          | NCI                                      | 76          | RCI                      | 37   | 113 | narrow                              | -0.448          | 0.124  | 0.240  |          |        |        |           |
| 50         | Hutchinson et al., 2013  | 99          | NCI_to_bRCI                              | 47          |                          |      | 47  | extreme                             |                 | -0.020 | 0.926  |          |        |        |           |
| 51         | Johnson et al., 2006     | 100         | WCI                                      | 7           | NCI                      | 9    | 16  | narrow                              | -0.424          | 0.434  | -0.129 |          | 0.786  | 0.786  |           |
| 52         | Lemez et al., 2020       | 101         | WCI                                      | 37          | NCI                      | 21   | 58  | narrow                              |                 |        |        |          | 0.256  | 0.256  |           |
| 53         | Low et al., 2017         | 102         | NCI                                      | 16          | RCI                      | 20   | 36  | narrow                              | 0.721           | 1.208  | -0.700 | -0.996   |        |        |           |
| 54         | Maynard et al., 2016     | 103         | bRCI                                     | 92          |                          |      | 92  | medium                              |                 | 0.676  | -0.499 |          |        |        |           |
| 55         | Memmert et al., 2010_s1  | 104         | NCI                                      | 24          | RCI_high                 | 24   | 48  | narrow                              |                 | 0.682  | 0.321  | -0.636   | 0.089  |        |           |
| 55         | Memmert et al., 2010_s2  | 105         | RCI_high                                 | 24          | RCI_low                  | 24   | 48  | narrow                              |                 | -0.168 | -0.688 | -0.468   | -0.043 |        |           |
| 55         | Memmert et al., 2010_s3  | 106         | NCI                                      | 24          | RCI_low                  | 24   | 48  | medium                              |                 | 0.528  | -0.281 | -1.103   | 0.041  |        |           |
| 56         | Mendes et al., 2018      | 107         | NCI_high                                 | 14          | NCI_low                  | 64   | 78  | narrow                              |                 | -0.519 | -0.129 |          | -0.401 | -0.401 |           |
| 57         | Moesch et al., 2011      | 108         | WCI                                      | 143         | NCI                      | 94   | 237 | narrow                              | 0.420           | 0.630  | -0.230 |          | 0.060  |        |           |
| 58         | Moseid et al., 2019      | 109         | NCI_high                                 | 96          | NCI_low                  | 114  | 210 | narrow                              |                 |        |        |          | -0.260 | -0.260 |           |
| 59         | Noon et al., 2019        | 110         | NCI                                      | 16          | RCI                      | 60   | 76  | narrow                              | -0.504          |        |        |          |        |        |           |
| 60         | O'Connor et al., 2016    | 111         | NCI                                      | 22          | RCI                      | 105  | 127 | narrow                              |                 |        | 0.057  | -0.259   |        |        |           |
| 61         | Roca et al., 2012_s1     | 112         | RCI_high                                 | 16          | RCI_low                  | 16   | 32  | narrow                              | 0.362           | -0.224 | 0.267  | 0.670    | 0.074  |        |           |
| 61         | Roca et al., 2012_s2     | 113         | RCI_low                                  | 16          | bRCI                     | 16   | 32  | narrow                              |                 | -0.099 | 1.317  | 0.603    | -0.071 |        |           |
| 61         | Roca et al., 2012_s3     | 114         | RCI_high                                 | 16          | bRCI                     | 16   | 32  | medium                              |                 | -0.343 | 1.398  | 1.194    | -0.002 |        |           |



| Ref.<br>N <sup>o</sup> | Reference                      | Study<br>N <sup>o</sup> | Performance<br>level high <sup>(b)</sup> | Performance<br>level low <sup>(b)</sup> |          |     |     | Bandwidth | d perf<br>milestones <sup>(c)</sup> | d MSPr<br>start | d MSPr | d MSPI | d OSPrPI | d OSPr | d OSPI |
|------------------------|--------------------------------|-------------------------|------------------------------------------|-----------------------------------------|----------|-----|-----|-----------|-------------------------------------|-----------------|--------|--------|----------|--------|--------|
|                        |                                |                         |                                          | HP n                                    | LP n     | N   | N   |           |                                     |                 |        |        |          |        |        |
| 62                     | San & Lee, 2014                | 115                     | NCI                                      | 15                                      | RCI      | 15  | 30  | medium    |                                     | -0.128          | 1.145  | 0.155  | -2.327   |        |        |
| 63                     | Sawai et al., 2018             | 116                     | NCI                                      | 258                                     | RCI_bRCI | 273 | 531 | medium    |                                     | -0.300          | 0.492  |        |          |        |        |
| 64                     | Sigmund & Güllich, 2020_s1     | 117                     | WCI                                      | 72                                      | NCI      | 116 | 188 | narrow    |                                     |                 | -0.087 | -0.093 | 0.292    | 0.526  | 0.057  |
| 64                     | Sigmund & Güllich, 2020_s2     | 118                     | WCI                                      | 67                                      | NCI      | 172 | 239 | narrow    |                                     |                 | 0.447  | -0.067 | -0.045   | -0.117 | -0.018 |
| 65                     | Smith, 2012                    | 119                     | RCI_high                                 | 36                                      | RCI_low  | 36  | 72  | narrow    |                                     | 0.506           | -0.510 | -0.321 |          |        |        |
| 66                     | Toering et al., 2009           | 120                     | NCI                                      | 159                                     | RCI_bRCI | 285 | 444 | medium    |                                     |                 | 3.228  |        | -0.460   | -0.460 |        |
| 67                     | Urena, 2004                    | 121                     | NCI_to_bRCI                              | 195                                     |          |     | 195 | extreme   |                                     |                 | 0.985  |        |          |        |        |
| 68                     | Ward et al., 2007              | 122                     | NCI                                      | 102                                     | bRCI     | 101 | 203 | extreme   |                                     | -0.623          | 4.782  | -1.098 | -1.190   | -1.003 | -1.376 |
| 69                     | Weissensteiner et al., 2008_s1 | 123                     | NCI                                      | 13                                      | bRCI     | 10  | 23  | extreme   |                                     |                 | 1.482  | -0.297 | -0.024   | -0.207 | 0.160  |
| 69                     | Weissensteiner et al., 2008_s2 | 124                     | NCI                                      | 18                                      | bRCI     | 20  | 38  | extreme   |                                     |                 | 0.708  | -0.322 | 0.063    | 0.186  | -0.061 |
| 69                     | Weissensteiner et al., 2008_s3 | 125                     | NCI                                      | 21                                      | bRCI     | 20  | 41  | extreme   |                                     |                 | 1.206  | 0.810  | 0.312    | 0.224  | 0.400  |
| 70                     | Williams et al., 2012_s1       | 126                     | NCI                                      | 12                                      | RCI      | 12  | 24  | medium    |                                     |                 |        | 0.680  |          |        |        |
| 70                     | Williams et al., 2012_s2       | 127                     | NCI                                      | 12                                      | bRCI     | 12  | 24  | extreme   |                                     |                 |        | 1.634  |          |        |        |
| 70                     | Williams et al., 2012_s3       | 128                     | RCI                                      | 12                                      | bRCI     | 12  | 24  | medium    |                                     |                 |        | 1.029  |          |        |        |
| 71                     | Young & Salmela, 2010_s1       | 129                     | NCI                                      | 10                                      | RCI      | 24  | 34  | narrow    |                                     | 0.667           | 0.394  |        |          |        |        |
| 71                     | Young & Salmela, 2010_s2       | 130                     | RCI                                      | 24                                      | bRCI     | 14  | 38  | narrow    |                                     | -0.378          | 0.680  |        |          |        |        |
| 71                     | Young & Salmela, 2010_s3       | 131                     | NCI                                      | 10                                      | bRCI     | 14  | 24  | extreme   |                                     | 0.215           | 0.977  |        |          |        |        |

<sup>(b)</sup> WCI = world class, NCI = national class,  
RCI = regional class, bRCI = below regional class

<sup>(c)</sup> d = Cohen's *d*, MS = main sport, OS = other sports,  
Pr = practice, PI = play

| Ref.<br>N° | Reference                       | Study<br>N° | Source of Cohen's d                                                   | Annotation                                  |
|------------|---------------------------------|-------------|-----------------------------------------------------------------------|---------------------------------------------|
| 1          | Baker et al., 2003a             | 1           | converted from reported F                                             | HP: coach evaluation, LP: competition level |
| 2          | Baker et al., 2003b             | 2           | reported d                                                            | HP: coach evaluation, LP: competition level |
| 3          | Baker et al., 2005_s1           | 3           | calculated from reported M ± SD                                       |                                             |
| 3          | Baker et al., 2005_s2           | 4           | calculated from reported M ± SD                                       |                                             |
| 3          | Baker et al., 2005_s3           | 5           | calculated from reported M ± SD                                       |                                             |
| 4          | Baker et al., 2006_s1           | 6           | calculated from reported M ± SD                                       |                                             |
| 4          | Baker et al., 2006_s2           | 7           | calculated from reported M ± SD                                       |                                             |
| 4          | Baker et al., 2006_s3           | 8           | calculated from reported M ± SD                                       |                                             |
| 5          | Baker et al., 2012_s1           | 9           | calculated from reported M ± SD (partly from figure)                  |                                             |
| 5          | Baker et al., 2012_s2           | 10          | calculated from reported M ± SD (partly from figure)                  |                                             |
| 6          | Barreiros et al., 2013          | 11          | calculated from reported M ± SD                                       | sex controlled for                          |
| 7          | Berry et al., 2008              | 12          | reported d or calculated from reported M ± SD                         |                                             |
| 8          | Bjoerndal et al., 2016_s1       | 13          | calculated from reported M ± SD                                       |                                             |
| 8          | Bjoerndal et al., 2016_s2       | 14          | calculated from reported M ± SD                                       |                                             |
| 8          | Bjoerndal et al., 2016_s3       | 15          | calculated from reported M ± SD                                       |                                             |
| 9          | Bruce et al., 2013              | 16          | calculated from reported M ± SD                                       | HP: coach evaluation, LP: competition level |
| 10         | Casado et al., 2019_s1          | 17          | calculated from reported M ± SD                                       |                                             |
| 10         | Casado et al., 2019_s2          | 18          | calculated from reported M ± SD                                       |                                             |
| 10         | Casado et al., 2019_s3          | 19          | calculated from reported M ± SD                                       |                                             |
| 11         | Cathey & French, 2014           | 20          | calculated from reported M ± SD                                       |                                             |
| 12         | Cathey, 2010                    | 21          | calculated from reported M ± SD                                       |                                             |
| 13         | Coelho-e-Silva et al., 2012     | 22          | calculated from reported M ± SD                                       |                                             |
| 14         | Coutinho et al., 2014           | 23          | converted from reported $\chi^2$ (frequencies within categories) or F | sex controlled for                          |
| 15         | Coutinho et al., 2015_s1        | 24          | calculated from reported M ± SD                                       | (d)                                         |
| 15         | Coutinho et al., 2015_s2        | 25          | calculated from reported M ± SD                                       | (d)                                         |
| 16         | Coutinho et al., 2016_s1        | 26          | calculated from reported M ± SD                                       |                                             |
| 16         | Coutinho et al., 2016_s2        | 27          | calculated from reported M ± SD                                       |                                             |
| 17         | Da Matta, 2004                  | 28          | calculated from reported M ± SD or converted from reported F          | HP: coach evaluation, LP: competition level |
| 18         | Deghansai et al., 2016          | 29          | reported d                                                            |                                             |
| 19         | Drake & Breslin, 2017           | 30          | reported d or calculated from reported M ± SD (partly from figure)    | (d)                                         |
| 20         | Duffy et al., 2004_s1           | 31          | calculated from reported M ± SD                                       |                                             |
| 20         | Duffy et al., 2004_s2           | 32          | calculated from reported M ± SD                                       |                                             |
| 21         | Elferink-Gemser et al., 2004_s1 | 33          | calculated from reported M ± SD                                       |                                             |
| 21         | Elferink-Gemser et al., 2004_s2 | 34          | calculated from reported M ± SD                                       |                                             |
| 22         | Elferink-Gemser et al., 2006_s1 | 35          | calculated from reported M ± SD                                       |                                             |
| 22         | Elferink-Gemser et al., 2006_s2 | 36          | calculated from reported M ± SD                                       |                                             |
| 23         | Elferink-Gemser et al., 2011_s1 | 37          | reported d                                                            | sex controlled for                          |
| 23         | Elferink-Gemser et al., 2011_s2 | 38          | reported d                                                            | sex controlled for                          |

| Ref.<br>N <sup>o</sup> | Study<br>Reference         | Study<br>N <sup>o</sup> | Source of Cohen's d                                      | Annotation                                          |
|------------------------|----------------------------|-------------------------|----------------------------------------------------------|-----------------------------------------------------|
| 24                     | Erikstad et al., 2018      | 39                      | converted from reported $r_s$                            |                                                     |
| 25                     | Ford & Williams, 2012      | 40                      | reported d                                               |                                                     |
| 26                     | Ford et al., 2009_s1       | 41                      | reported d or calculated from reported M $\pm$ SD        |                                                     |
| 26                     | Ford et al., 2009_s2       | 42                      | reported d or calculated from reported M $\pm$ SD        | HP: coach evaluation, LP: competition level         |
| 27                     | Ford et al., 2010          | 43                      | reported d                                               |                                                     |
| 28                     | Guimaraes et al., 2019     | 44                      | converted from reported r                                |                                                     |
| 29                     | Güllich & Emrich, 2014_s1  | 45                      | reported d and raw data                                  | sex controlled for; OSPI unpublished <sup>(d)</sup> |
| 29                     | Güllich & Emrich, 2014_s10 | 46                      | reported d and raw data                                  | sex controlled for <sup>(d)</sup>                   |
| 29                     | Güllich & Emrich, 2014_s11 | 47                      | reported d and raw data                                  | sex controlled for <sup>(d)</sup>                   |
| 29                     | Güllich & Emrich, 2014_s12 | 48                      | reported d and raw data                                  | sex controlled for <sup>(d)</sup>                   |
| 29                     | Güllich & Emrich, 2014_s13 | 49                      | reported d and raw data                                  | sex controlled for <sup>(d)</sup>                   |
| 29                     | Güllich & Emrich, 2014_s14 | 50                      | reported d and raw data                                  | sex controlled for <sup>(d)</sup>                   |
| 29                     | Güllich & Emrich, 2014_s15 | 51                      | reported d and raw data                                  | sex controlled for <sup>(d)</sup>                   |
| 29                     | Güllich & Emrich, 2014_s2  | 52                      | reported d and raw data                                  | sex controlled for; OSPI unpublished <sup>(d)</sup> |
| 29                     | Güllich & Emrich, 2014_s3  | 53                      | reported d and raw data                                  | sex controlled for; OSPI unpublished <sup>(d)</sup> |
| 29                     | Güllich & Emrich, 2014_s4  | 54                      | reported d and raw data                                  | sex controlled for; OSPI unpublished <sup>(d)</sup> |
| 29                     | Güllich & Emrich, 2014_s6  | 55                      | reported d and raw data                                  | sex controlled for; OSPI unpublished <sup>(d)</sup> |
| 29                     | Güllich & Emrich, 2014_s7  | 56                      | reported d and raw data                                  | sex controlled for; OSPI unpublished <sup>(d)</sup> |
| 29                     | Güllich & Emrich, 2014_s8  | 57                      | reported d and raw data                                  | sex controlled for; OSPI unpublished <sup>(d)</sup> |
| 29                     | Güllich & Emrich, 2014_s9  | 58                      | reported d and raw data                                  | sex controlled for; OSPI unpublished <sup>(d)</sup> |
| 30                     | Güllich et al., 2020       | 59                      | converted from raw data                                  | <sup>(d)</sup>                                      |
| 31                     | Güllich, 2014              | 60                      | reported d and raw data                                  | <sup>(d)</sup>                                      |
| 32                     | Güllich, 2017_s1           | 61                      | reported d and raw data                                  | matched pairs; OSPI unpublished <sup>(d)</sup>      |
| 32                     | Güllich, 2017_s2           | 62                      | reported d and raw data                                  | matched pairs; OSPI unpublished <sup>(d)</sup>      |
| 32                     | Güllich, 2017_s3           | 63                      | reported d and raw data                                  | matched pairs; OSPI unpublished <sup>(d)</sup>      |
| 32                     | Güllich, 2017_s4           | 64                      | reported d and raw data                                  | matched pairs; OSPI unpublished <sup>(d)</sup>      |
| 32                     | Güllich, 2017_s5           | 65                      | reported d and raw data                                  | matched pairs; OSPI unpublished <sup>(d)</sup>      |
| 33                     | Güllich, 2018a_s1          | 66                      | reported d and raw data                                  | matched pairs <sup>(d)</sup>                        |
| 33                     | Güllich, 2018a_s2          | 67                      | reported d and raw data                                  | matched pairs <sup>(d)</sup>                        |
| 33                     | Güllich, 2018a_s3          | 68                      | reported d and raw data                                  | matched pairs <sup>(d)</sup>                        |
| 33                     | Güllich, 2018a_s4          | 69                      | reported d and raw data                                  | matched pairs <sup>(d)</sup>                        |
| 34                     | Güllich, 2019              | 70                      | reported d and raw data                                  | <sup>(d)</sup>                                      |
| 35                     | Gunn et al., 2019          | 71                      | converted from reported r                                |                                                     |
| 36                     | Hardy et al., 2013         | 72                      | calculated from reported M $\pm$ SD and raw data         | matched pairs <sup>(d)</sup>                        |
| 37                     | Harris, 2008               | 73                      | calculated from reported M $\pm$ SD                      |                                                     |
| 38                     | Haugaasen et al., 2014     | 74                      | from reported ES, p                                      |                                                     |
| 39                     | Helsen et al., 1998_s1     | 75                      | calculated from reported M $\pm$ SD (partly from figure) |                                                     |
| 39                     | Helsen et al., 1998_s2     | 76                      | calculated from reported M $\pm$ SD (partly from figure) |                                                     |

| Ref.<br>N° | Reference                | Study<br>N° | Source of Cohen's d                                        | Annotation                                  |
|------------|--------------------------|-------------|------------------------------------------------------------|---------------------------------------------|
| 39         | Helsen et al., 1998_s3   | 77          | calculated from reported M ± SD (partly from figure)       |                                             |
| 39         | Helsen et al., 1998_s4   | 78          | calculated from reported M ± SD (partly from figure)       | HP: coach evaluation, LP: competition level |
| 39         | Helsen et al., 1998_s5   | 79          | calculated from reported M ± SD (partly from figure)       |                                             |
| 39         | Helsen et al., 1998_s6   | 80          | calculated from reported M ± SD (partly from figure)       | HP: coach evaluation, LP: competition level |
| 40         | Hendry & Hodges, 2018_s1 | 81          | reported d                                                 |                                             |
| 40         | Hendry & Hodges, 2018_s2 | 82          | reported d                                                 |                                             |
| 41         | Hendry et al., 2018_s1   | 83          | converted from reported r                                  |                                             |
| 41         | Hendry et al., 2018_s2   | 84          | converted from reported r                                  |                                             |
| 42         | Hendry et al., 2019a     | 85          | reported d                                                 |                                             |
| 43         | Hendry et al., 2019b     | 86          | calculated from reported M ± SD (partly from figure)       |                                             |
| 44         | Hendry, 2012_s1          | 87          | converted from reported r                                  |                                             |
| 44         | Hendry, 2012_s2          | 88          | converted from reported r                                  |                                             |
| 44         | Hendry, 2012_s3          | 89          | converted from reported r                                  |                                             |
| 45         | Hodges et al., 2015      | 90          | converted from reported r                                  |                                             |
| 46         | Hopwood et al., 2015_s1  | 91          | calculated from reported M ± SD                            |                                             |
| 46         | Hopwood et al., 2015_s2  | 92          | calculated from reported M ± SD                            |                                             |
| 46         | Hopwood et al., 2015_s3  | 93          | calculated from reported M ± SD                            |                                             |
| 47         | Hornig et al., 2016_s1   | 94          | reported d and raw data                                    | (d)                                         |
| 47         | Hornig et al., 2016_s2   | 95          | reported d and raw data                                    | (d)                                         |
| 47         | Hornig et al., 2016_s3   | 96          | reported d and raw data                                    | (d)                                         |
| 48         | Huijgen et al., 2009     | 97          | calculated from reported M ± SD                            |                                             |
| 49         | Huijgen et al., 2013     | 98          | calculated from reported M ± SD                            |                                             |
| 50         | Hutchinson et al., 2013  | 99          | converted from reported r                                  | sex controlled for                          |
| 51         | Johnson et al., 2006     | 100         | calculated from reported individual raw data (from figure) | sex controlled for <sup>(d)</sup>           |
| 52         | Lemez et al., 2020       | 101         | calculated from reported M ± SD                            |                                             |
| 53         | Low et al., 2017         | 102         | calculated from reported M ± SD                            |                                             |
| 54         | Maynard et al., 2016     | 103         | converted from reported r                                  | (d)                                         |
| 55         | Memmert et al., 2010_s1  | 104         | calculated from reported M ± SD and raw data               | sex controlled for <sup>(d)</sup>           |
| 55         | Memmert et al., 2010_s2  | 105         | calculated from reported M ± SD and raw data               | sex controlled for <sup>(d)</sup>           |
| 55         | Memmert et al., 2010_s3  | 106         | calculated from reported M ± SD and raw data               | sex controlled for <sup>(d)</sup>           |
| 56         | Mendes et al., 2018      | 107         | calculated from reported M ± SD                            | (d)                                         |
| 57         | Moesch et al., 2011      | 108         | reported d and raw data                                    | sex controlled for <sup>(d)</sup>           |
| 58         | Moseid et al., 2019      | 109         | calculated from reported frequency distributions           |                                             |
| 59         | Noon et al., 2019        | 110         | calculated from reported frequency distributions           |                                             |
| 60         | O'Connor et al., 2016    | 111         | calculated from reported M ± SD                            |                                             |
| 61         | Roca et al., 2012_s1     | 112         | calculated from reported M ± SD                            |                                             |
| 61         | Roca et al., 2012_s2     | 113         | calculated from reported M ± SD                            | HP: lab testing, LP: competition level      |
| 61         | Roca et al., 2012_s3     | 114         | calculated from reported M ± SD                            | HP: lab testing, LP: competition level      |

| Ref.<br>N° | Reference                      | Study<br>N° | Source of Cohen's d                                            | Annotation                                                 |
|------------|--------------------------------|-------------|----------------------------------------------------------------|------------------------------------------------------------|
| 62         | San & Lee, 2014                | 115         | calculated from reported $M \pm SD$                            |                                                            |
| 63         | Sawai et al., 2018             | 116         | calculated from reported $M \pm SD$                            |                                                            |
| 64         | Sigmund & Güllich, 2020_s1     | 117         | calculated from raw data                                       | sex controlled for <sup>(d)</sup>                          |
| 64         | Sigmund & Güllich, 2020_s2     | 118         | calculated from raw data                                       | sex controlled for <sup>(d)</sup>                          |
| 65         | Smith, 2012                    | 119         | converted from reported F or calculated from reported raw data |                                                            |
| 66         | Toering et al., 2009           | 120         | calculated from reported $M \pm SD$                            |                                                            |
| 67         | Urena, 2004                    | 121         | converted from reported r or F                                 |                                                            |
| 68         | Ward et al., 2007              | 122         | calculated from reported $M \pm SD$ (partly from figure)       |                                                            |
| 69         | Weissensteiner et al., 2008_s1 | 123         | calculated from reported $M \pm SD$ (partly from figure)       | HP: coach evaluation, LP: competition level <sup>(d)</sup> |
| 69         | Weissensteiner et al., 2008_s2 | 124         | calculated from reported $M \pm SD$ (partly from figure)       | HP: coach evaluation, LP: competition level <sup>(d)</sup> |
| 69         | Weissensteiner et al., 2008_s3 | 125         | calculated from reported $M \pm SD$ (partly from figure)       | HP: coach evaluation, LP: competition level <sup>(d)</sup> |
| 70         | Williams et al., 2012_s1       | 126         | calculated from reported $M \pm SD$                            |                                                            |
| 70         | Williams et al., 2012_s2       | 127         | calculated from reported $M \pm SD$                            |                                                            |
| 70         | Williams et al., 2012_s3       | 128         | calculated from reported $M \pm SD$                            |                                                            |
| 71         | Young & Salmela, 2010_s1       | 129         | calculated from reported $M \pm SD$ (partly from figure)       |                                                            |
| 71         | Young & Salmela, 2010_s2       | 130         | calculated from reported $M \pm SD$ (partly from figure)       |                                                            |
| 71         | Young & Salmela, 2010_s3       | 131         | calculated from reported $M \pm SD$ (partly from figure)       |                                                            |

<sup>(d)</sup> Direct interaction with authors and/or original data were made available.

1. Baker J, Cote J, Abernethy B. Sport-specific practice and the development of expert decision-making in team ball sports. *Journal of Applied Sport Psychology*. 2003;15:12–25. doi:10.1080/10413200305400.
2. Baker J, Côté J, Abernethy B. Learning from the experts: practice activities of expert decision makers in sport. *Res Q Exerc Sport*. 2003;74:342–7. doi:10.1080/02701367.2003.10609101.
3. Baker J, Côté J, Deakin J. Expertise in ultra-endurance triathletes early sport involvement, training structure, and the theory of deliberate practice. *J Appl Sport Psychol*. 2005;17:64–78. doi:10.1080/10413200590907577.
4. Baker J, Côté J, Deakin J. Patterns of early involvement in expert and nonexpert masters triathletes. *Res Q Exerc Sport*. 2006;77:401–7. doi:10.1080/02701367.2006.10599375.
5. Baker J, Bagats S, Büsch D, Strauss B, Schorer J. Training differences and selection in a talent identification system. *Talent Development & Excellence*. 2012;4:23–32.
6. Barreiros A, Côté J, Fonseca AM. Training and psychosocial patterns during the early development of Portuguese national team athletes. *High Ability Studies*. 2013;24:49–61. doi:10.1080/13598139.2013.780965.
7. Berry J, Abernethy B, Côté J. The contribution of structured activity and deliberate play to the development of expert perceptual and decision-making skill. *J Sport Exerc Psychol*. 2008;30:685–708. doi:10.1123/jsep.30.6.685.
8. Bjørndal CT, Ronglan LT, Andersen SS. The diversity of developmental paths among youth athletes: a 3-year longitudinal study of Norwegian handball players. *Journal of Talent Development and Excellence*. 2016;8:20–32.
9. Bruce L, Farrow D, Raynor A. Performance milestones in the development of expertise: are they critical? *J Appl Sport Psychol*. 2013;25:281–97. doi:10.1080/10413200.2012.725704.

10. Casado A, Hanley B, Ruiz-Pérez LM. Deliberate practice in training differentiates the best Kenyan and Spanish long-distance runners. *Eur J Sport Sci.* 2019;online first. doi:10.1080/17461391.2019.1694077.
11. Cathey RM, French KE. Retrospective practice histories of expert and novice baseball pitchers. *Res Q Exerc Sport.* 2014;85:A108. doi:10.1080/02701367.2014.948745.
12. Cathey RM. Retrospective practice histories of expert and novice baseball pitchers [Doctoral Thesis]. Columbia: University of South Carolina; 2010.
13. Coelho-E-Silva MJ, Vaz V, Simões F, Carvalho HM, Valente-Dos-Santos J, Figueiredo AJ, et al. Sport selection in under-17 male roller hockey. *J Sports Sci.* 2012;30:1793–802. doi:10.1080/02640414.2012.709262.
14. Coutinho P, Mesquita I, Fonseca AM, Martin-Silva L de. Patterns of sport participation in Portuguese volleyball players according to expertise level and gender. *Int J Sports Sci Coach.* 2014;9:579–92. doi:10.1260/1747-9541.9.4.579.
15. Coutinho P, Mesquita I, Fonseca AM, Côte J. Expertise development in Volleyball: the role of early sport activities and players' age and height. *Kinesiology.* 2015;47:215–25.
16. Coutinho P, Mesquita I, Davids K, Fonseca AM, Côté J. How structured and unstructured sport activities aid the development of expertise in volleyball players. *Psychol Sport Exerc.* 2016;25:51–9. doi:10.1016/j.psychsport.2016.04.004.
17. Da Matta GB. The influence of deliberate practice and social support systems of the development of expert and intermediate women volleyball players in Brazil [Doctoral Thesis]. Columbia: University of South Carolina; 2004.
18. Dehghansai N, Srdjan Lemez, Wattie N, Baker J. Talent or physical precocity; Examination of junior, senior and precocious para-athletes' developmental trajectories and training histories; 2016.

19. Drake D, Breslin G. Developmental activities and the acquisition of perceptual-cognitive expertise in international field hockey players. *Int J Sports Sci Coach*. 2019;online first. doi:10.1177/1747954117711093.
20. Duffy LJ, Baluch B, Ericsson AK. Dart performance as a function of facets of practice amongst professional and amateur men and women players. *Int J Sport Psychol*. 2004;3:232–45.
21. Elferink-Gemser MT, Visscher C, Lemmink KAPM, Mulder TW. Relation between multidimensional performance characteristics and level of performance in talented youth field hockey players. *J Sports Sci*. 2004;22:1053–63. doi:10.1080/02640410410001729991.
22. Elferink-Gemser MT, Visscher C, Lemmink KAPM, Mulder T. Multidimensional performance characteristics and standard of performance in talented youth field hockey players: a longitudinal study. *J Sports Sci*. 2006;online first. doi:10.1080/02640410600719945.
23. Elferink-Gemser MT, Starkes JL, Medic N, Lemmink KAPM, Visscher, C. What discriminates elite and sub-elite youth field hockey players. *Annals of Research in Sport and Physical Activity*. 2011;50–68. doi:10.14195/2182-7087\_1\_3.
24. Erikstad MK, Høigaard R, Johansen BT, Kandala N-B, Haugen T. Childhood football play and practice in relation to self-regulation and national team selection; a study of Norwegian elite youth players. *J Sports Sci*. 2018;36:2304–10. doi:10.1080/02640414.2018.1449563.
25. Ford PR, Williams AM. The developmental activities engaged in by elite youth soccer players who progressed to professional status compared to those who did not. *Psychol Sport Exerc*. 2012;13:349–52. doi:10.1016/j.psychsport.2011.09.004.
26. Ford PR, Ward P, Hodges NJ, Williams AM. The role of deliberate practice and play in career progression in sport: the early engagement hypothesis. *High Ability Studies*. 2009;20:65–75. doi:10.1080/13598130902860721.



27. Ford PR, Low J, McRobert AP, Williams AM. Developmental activities that contribute to high or low performance by elite cricket batters when recognizing type of delivery from bowlers' advanced postural cues. *J Sport Exerc Psychol.* 2010;32:638–54. doi:10.1123/jsep.32.5.638.
28. Guimarães E, Ramos A, Janeira MA, Baxter-Jones ADG, Maia J. How does biological maturation and training experience impact the physical and technical performance of 11-14-year-old male basketball players? *Sports (Basel)* 2019. doi:10.3390/sports7120243.
29. Güllich A, Emrich E. Considering long-term sustainability in the development of world class success. *Eur J Sport Sci.* 2014;14 Suppl 1:S383-S397. doi:10.1080/17461391.2012.706320.
30. Güllich A, Cronauer R, Diehl J, Gard L, Miller C. Coach-assessed skill learning progress of youth soccer players correlates with earlier childhood practice in other sports. *Int J Sports Sci Coach.* 2020;15:285–96. doi:10.1177/1747954120912351.
31. Güllich A. Many roads lead to Rome—developmental paths to Olympic gold in men's field hockey. *Eur J Sport Sci.* 2014;14:763–71. doi:10.1080/17461391.2014.905983.
32. Güllich A. International medallists' and non-medallists' developmental sport activities - a matched-pairs analysis. *J Sports Sci.* 2017;35:2281–8. doi:10.1080/02640414.2016.1265662.
33. Güllich A. Sport-specific and non-specific practice of strong and weak responders in junior and senior elite athletics - a matched-pairs analysis. *J Sports Sci.* 2018;36:2256–64. doi:10.1080/02640414.2018.1449089.
34. Güllich A. “Macro-structure” of developmental participation histories and “micro-structure” of practice of German female world-class and national-class football players. *J Sports Sci.* 2019;37:1347–55. doi:10.1080/02640414.2018.1558744.

35. Gunn SM, Mangine GT, VanDusseldorp TA, Hester GM. Influence of sport specialization on athletic performance and injury risk in collegiate swimmers. *The Kennesaw Journal of Undergraduate Research*. 2019;6:Article 3. doi:10.32727/25.2019.31.
36. Hardy L, Laing S, Barlow M, Kincheva L, Evans L, Rees T, et al. A comparison of the biographies of GB serial medal and non-medalling olympic athletes. London; 2013.
37. Harris KR. Deliberate practice, mental representations, and skilled performance in bowling [Doctoral Thesis]. Tallahassee: Florida State University; 2008.
38. Hugaasen M, Toering T, Jordet G. From childhood to senior professional football: a multi-level approach to elite youth football players' engagement in football-specific activities. *Psychol Sport Exerc*. 2014;15:336–44. doi:10.1016/j.psychsport.2014.02.007.
39. Helsen WF, Starkes JL, Hodges NJ. Team sports and the theory of deliberate practice. *J Sport Exerc Psychol*. 1998;20:12–34.
40. Hendry DT, Hodges NJ. Early majority engagement pathway best defines transitions from youth to adult elite men's soccer in the UK: a three time-point retrospective and prospective study. *Psychol Sport Exerc*. 2018;36:81–9. doi:10.1016/j.psychsport.2018.01.009.
41. Hendry DT, Williams AM, Hodges NJ. Coach ratings of skills and their relations to practice, play and successful transitions from youth-elite to adult-professional status in soccer. *J Sports Sci*. 2018;36:2009–17. doi:10.1080/02640414.2018.1432236.
42. Hendry DT, Crocker PRE, Williams AM, Hodges NJ. Tracking and comparing self-determined motivation in elite youth soccer: influence of developmental activities, age, and skill. *Front Psychol*. 2019;10:304. doi:10.3389/fpsyg.2019.00304.
43. Hendry DT, Williams AM, Ford PR, Hodges NJ. Developmental activities and perceptions of challenge for National and Varsity women soccer players in Canada. *Psychol Sport Exerc*. 2019;43:210–8. doi:10.1016/j.psychsport.2019.02.008.

44. Hendry DT. The role of developmental activities on self determined motivation, passion and skill in youth soccer players [Master Thesis]. Vancouver: The University of British Columbia; 2012.
45. Hodges NJ, Augaitis L, Crocker PRE. Sport commitment and deliberate practice among male and female triathletes. *Int J Sport Psychol.* 2015;46:652–65. doi:10.7352/IJSP.2015.46.652.
46. Hopwood M, Macmahon C, Farrow D, Baker J. Is practice the only determinant of sporting expertise? Revisiting Starkes (2000). *Int J Sport Psychol.* 2015;46:631–51. doi:10.7352/IJSP.2015.46.631.
47. Hornig M, Aust F, Güllich A. Practice and play in the development of German top-level professional football players. *Eur J Sport Sci.* 2016;16:96–105. doi:10.1080/17461391.2014.982204.
48. Huijgen BCH, Elferink-Gemser MT, Post WJ, Visscher C. Soccer skill development in professionals. *Int J Sports Med.* 2009;30:585–91. doi:10.1055/s-0029-1202354.
49. Huijgen BCH, Elferink-Gemser MT, Post WJ, Visscher C. Soccer skill development in professionals. In: Huijgen BCH, editor. *Technical skills the key to success? A study on talent development and selection of youth soccer players* [Doctoral Thesis]. Groningen: University of Groningen; 2013. pp. 53–67
50. Hutchinson CU, Sachs-Ericsson NJ, Ericsson KA. Generalizable aspects of the development of expertise in ballet across countries and cultures: a perspective from the expert-performance approach. *High Ability Studies.* 2013;24:21–47. doi:10.1080/13598139.2013.780966.
51. Johnson MB, Tenenbaum G, Edmonds WA. Adaptation to physically and emotionally demanding conditions: the role of deliberate practice. *High Ability Studies.* 2006;17:117–36. doi:10.1080/13598130600947184.

52. Lemez S, Wattie N, Dehghansai N, Baker J. Developmental pathways of Para athletes: examining the sporting backgrounds of elite Canadian wheelchair basketball players. *CISS*. 2020;5:2. doi:10.15203/CISS\_2020.002.
53. Low J, Mohamad NI, Ong KB, Aziz SA, Abdullah MR, Maliki A. The developmental pathways of Malaysian elite youth badminton players. *Journal of Fundamental and Applied Sciences*. 2017;9:842–57. doi:10.4314/jfas.v9i2s.60.
54. Maynard D, Hambrick DZ, Meinz EJ. How important is deliberate practice for explaining expertise in sports? The case of bowling; 2016.
55. Memmert D, Baker J, Bertsch C. Play and practice in the development of sport-specific creativity in team ball sports. *High Ability Studies*. 2010;21:3–18. doi:10.1080/13598139.2010.488083.
56. Mendes FG, Nascimento JV, Souza ER, Collet C, Milistetd M, Côté J, Carvalho HM. Retrospective analysis of accumulated structured practice: a Bayesian multilevel analysis of elite Brazilian volleyball players. *High Ability Studies*. 2018;29:255–69. doi:10.1080/13598139.2018.1507901.
57. Moesch K, Elbe A-M, Hauge M-LT, Wikman JM. Late specialization: the key to success in centimeters, grams, or seconds (cgs) sports. *Scand J Med Sci Sports*. 2011;21:e282-90. doi:10.1111/j.1600-0838.2010.01280.x.
58. Moseid CH, Myklebust G, Fagerland MW, Bahr R. The association between early specialization and performance level with injury and illness risk in youth elite athletes. *Scand J Med Sci Sports*. 2019;29:460–8. doi:10.1111/sms.13338.
59. Noon MR, Eyre ELJ, Ellis M, Myers TD, Morris RO, Mundy PD, et al. The influence of recruitment age and anthropometric and physical characteristics on the development pathway of English academy football players. *Int J Sports Physiol Perform*. 2019;online first. doi:10.1123/ijsp.2019-0534.

60. O'Connor D, Larkin P, Mark Williams A. Talent identification and selection in elite youth football: an Australian context. *Eur J Sport Sci.* 2016;16:837–44. doi:10.1080/17461391.2016.1151945.
61. Roca A, Williams AM, Ford PR. Developmental activities and the acquisition of superior anticipation and decision making in soccer players. *J Sports Sci.* 2012;30:1643–52. doi:10.1080/02640414.2012.701761.
62. San ATL, Lee JLF. Developmental practice activities of elite youth swimmers. *Movement, Health & Exercise.* 2014;3:27–37. doi:10.15282/mohe.v3i0.15.
63. Sawai A, Mathis BJ, Natsui H, Zaboronok A, Mitsuhashi R, Warashina Y, et al. Risk of female athlete triad development in Japanese collegiate athletes is related to sport type and competitive level. *Int J Womens Health.* 2018;10:671–87. doi:10.2147/IJWH.S175446.
64. Sigmund P, Güllich A. Participation patterns of national-squad athletes in track-and-field and volleyball; 2020.
65. Smith SA. Retrospective practice histories of Division I and Division II female basketball players in the Carolinas [Doctoral Thesis]. Columbia: University of South Carolina; 2012.
66. Toering TT, Elferink-Gemser MT, Jordet G, Visscher C. Self-regulation and performance level of elite and non-elite youth soccer players. *J Sports Sci.* 2009;27:1509–17. doi:10.1080/02640410903369919.
67. Ureña CA. Skill acquisition in ballet dancers: the relationship between deliberate practice and expertise [Doctoral Thesis]. Tallahassee: Florida State University; 2004.
68. Ward P, Hodges NJ, Starkes JL, Williams MA. The road to excellence: deliberate practice and the development of expertise. *High Ability Studies.* 2007;18:119–53. doi:10.1080/13598130701709715.

69. Weissensteiner J, Abernethy B, Farrow D, Müller S. The development of anticipation: a cross-sectional examination of the practice experiences contributing to skill in cricket batting. *J Sport Exerc Psychol.* 2008;30:663–84. doi:10.1123/jsep.30.6.663.
70. Williams AM, Ward P, Bell-Walker J, Ford PR. Perceptual-cognitive expertise, practice history profiles and recall performance in soccer. *Br J Psychol.* 2012;103:393–411. doi:10.1111/j.2044-8295.2011.02081.x.
71. Young, BW, Salmela JH. Examination of practice activities related to the acquisition of elite performance in Canadian middle distance running. *Int J Sport Psychol.* 2010;41:73–90.

## Supplementary Materials

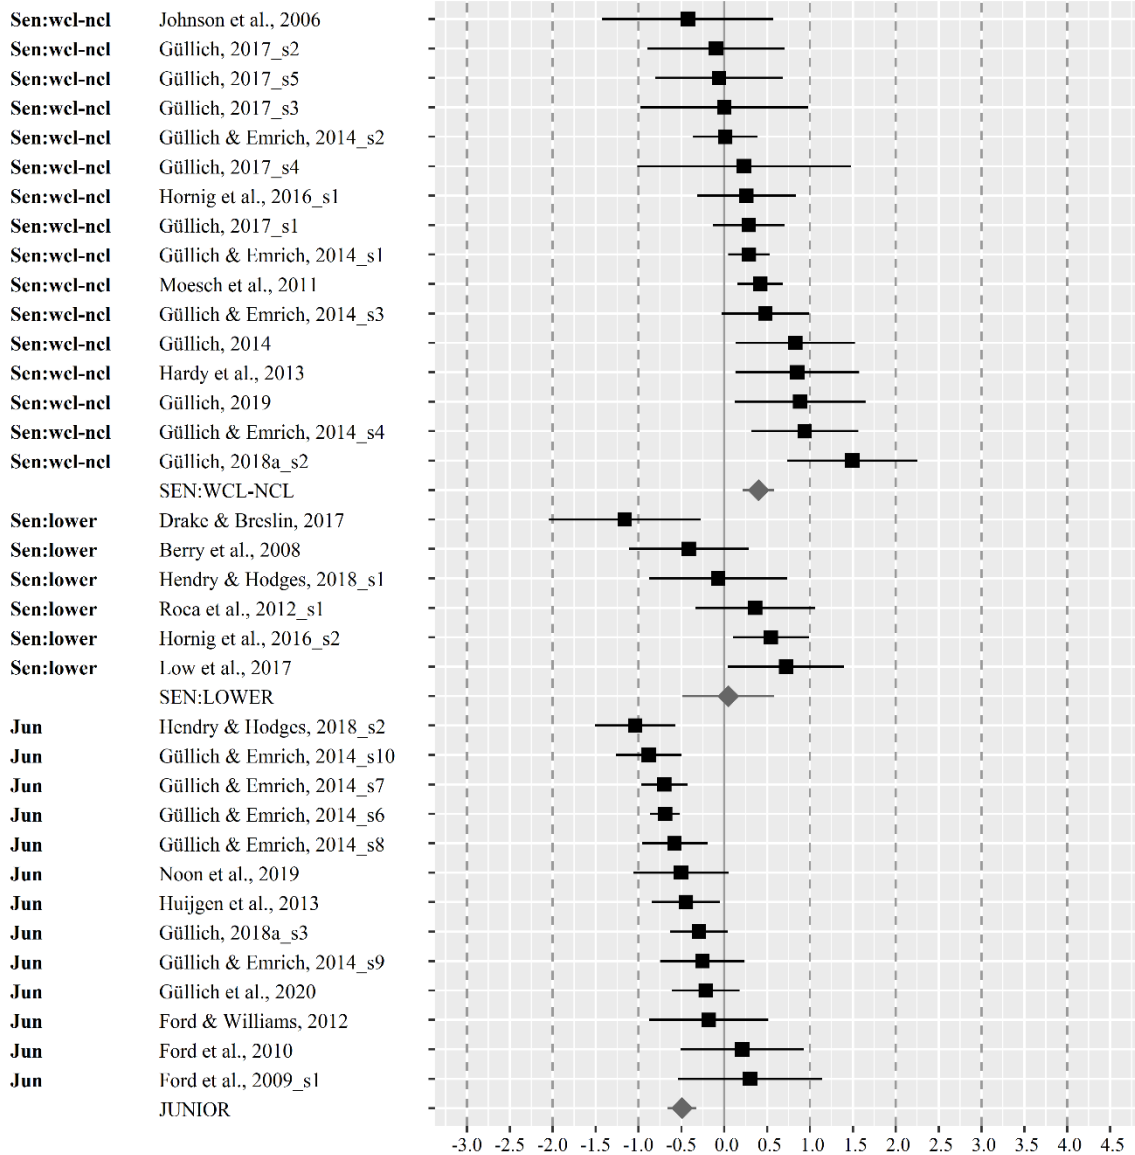

**Figure S1.** Age to reach performance milestones. Forest plot depicting each effect size (squares) and its 95% confidence interval (lines) entered into the meta-analytic model for differences between relatively higher and lower skilled athletes, along with the meta-analytic mean effect size overall and for junior athletes and senior athletes (diamonds). \_s# refers to independent samples. Senior world-class vs. national-class athletes (Sen:wcl-ncl)  $I^2=39.82$ , Senior lower-level (Sen:lower)  $I^2=70.74$ , Junior (Jun)  $I^2=54.81$ .

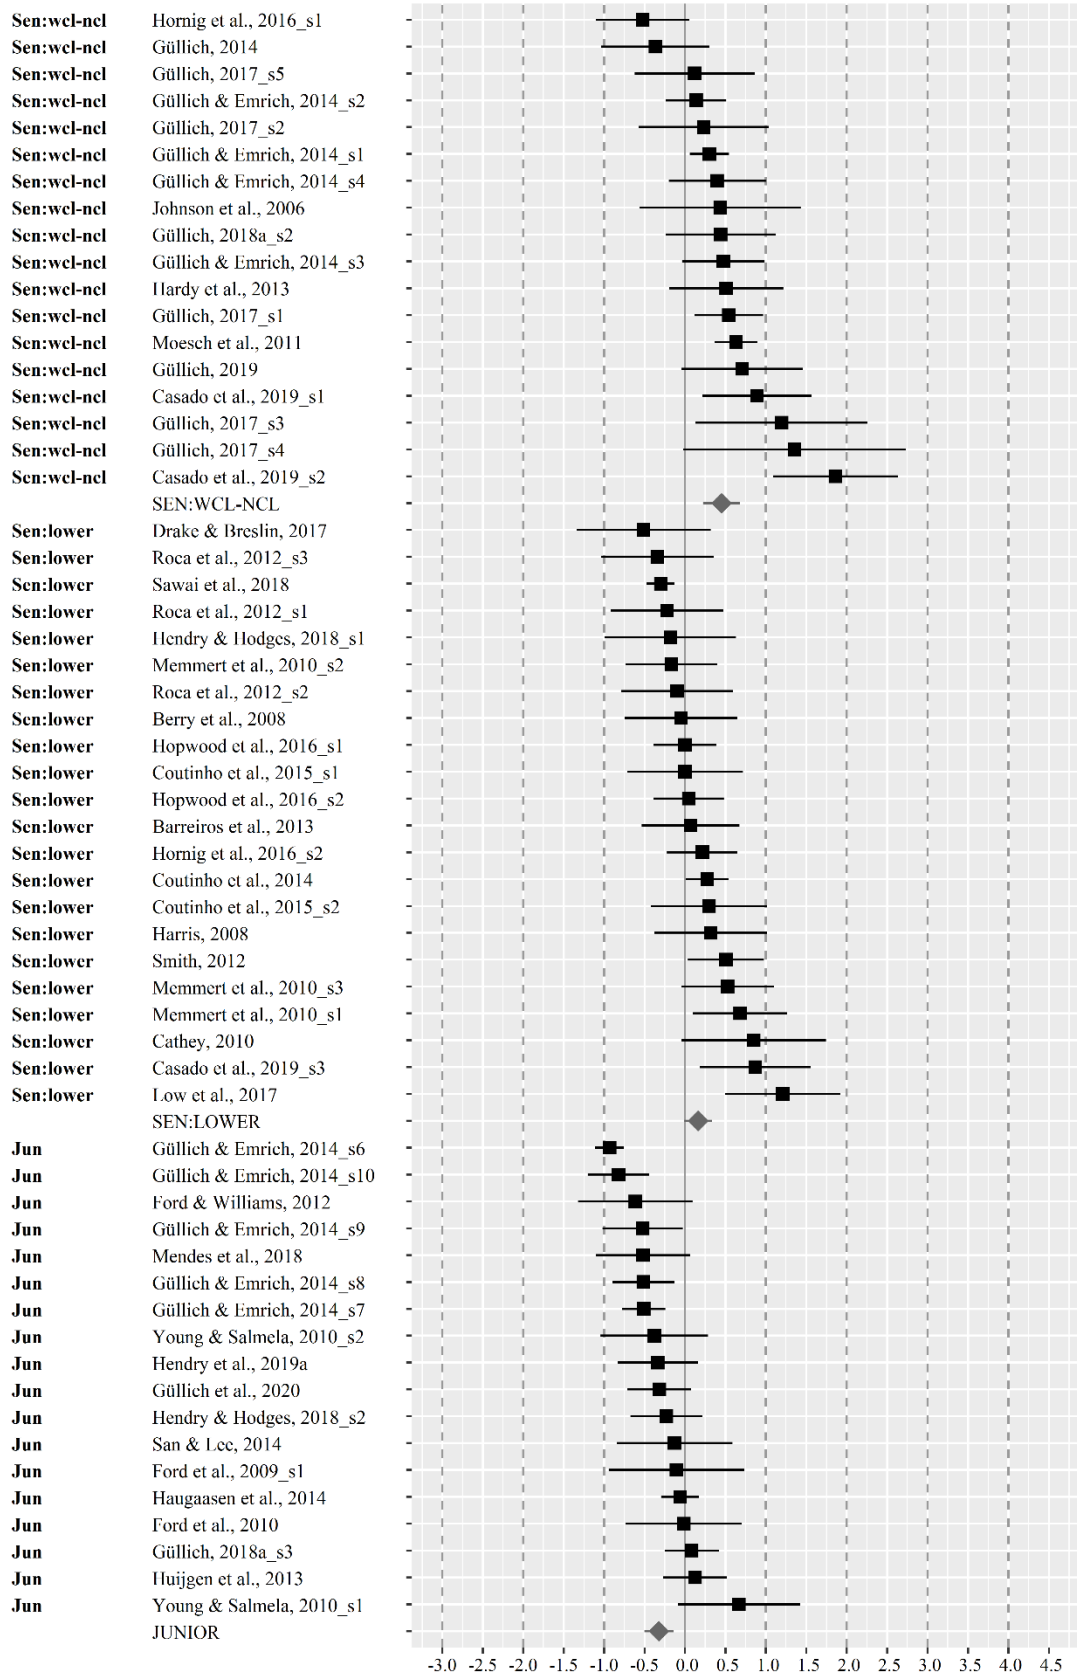

**Figure S2.** Main-sport starting age. Forest plot depicting each effect size (squares) and its 95% confidence interval (lines) entered into the meta-analytic model for differences between relatively higher and lower skilled athletes, along with the meta-analytic mean effect size overall and for junior athletes and senior athletes (diamonds). \_s# refers to independent samples. Senior world-class vs. national-class athletes (Sen:wcl-ncl)  $I^2=50.48$ , Senior lower-level (Sen:lower)  $I^2=57.79$ , Junior (Jun)  $I^2=76.29$ .



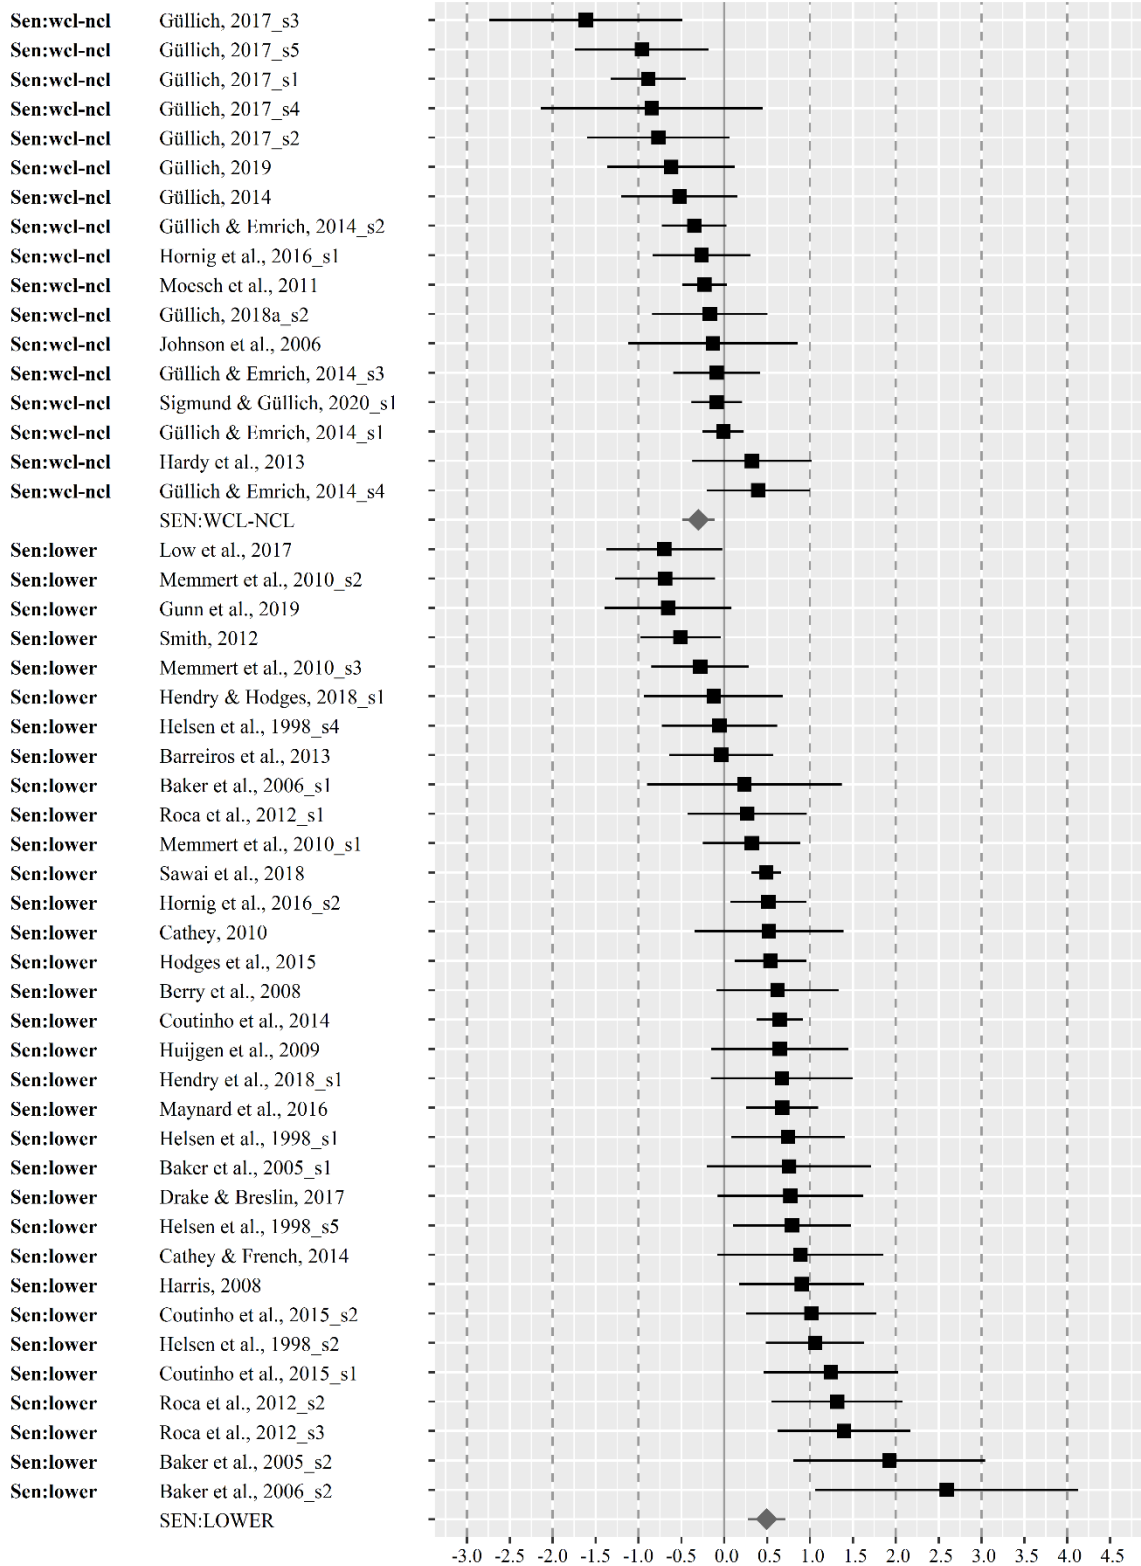

**Figure S3a.** Main-sport coach-led practice Seniors. Forest plot depicting each effect size (squares) and its 95% confidence interval (lines) entered into the meta-analytic model for differences between relatively higher and lower skilled athletes, along with the meta-analytic mean effect size overall and for junior athletes and senior athletes (diamonds). \_s# refers to independent samples. Senior world-class vs. national-class athletes (Sen:wcl-ncl)  $I^2=32.33$ , Senior lower-level (Sen:lower)  $I^2=62.36$ .

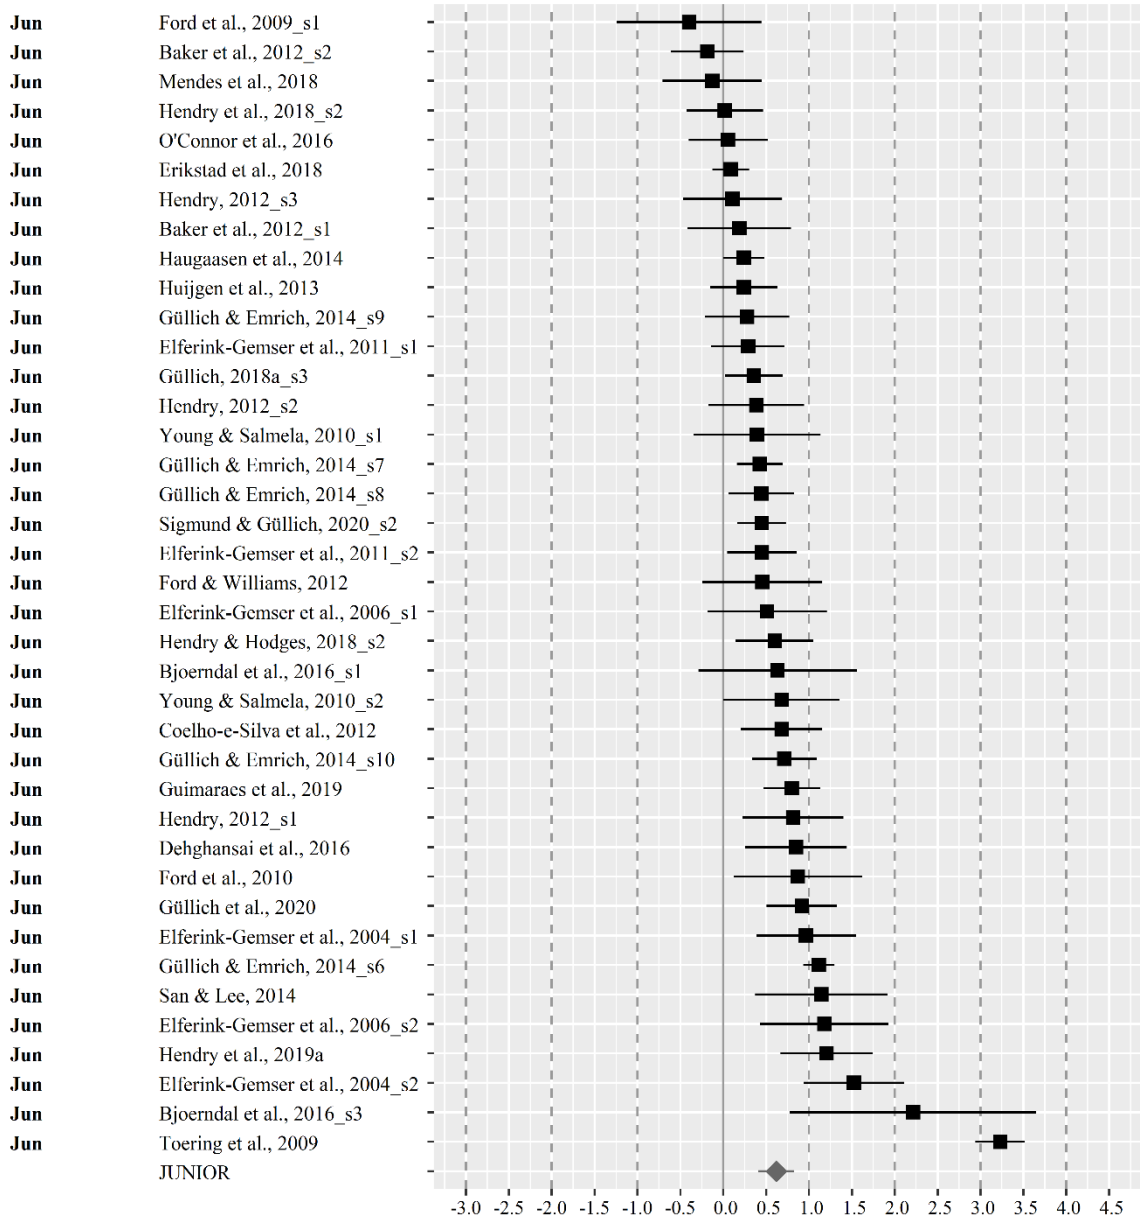

**Figure S3b.** Main-sport coach-led practice Juniors. Forest plot depicting each effect size (squares) and its 95% confidence interval (lines) entered into the meta-analytic model for differences between relatively higher and lower skilled athletes, along with the meta-analytic mean effect size overall and for junior athletes and senior athletes (diamonds). \_s# refers to independent samples. Junior (Jun)  $I^2=91.79$ .

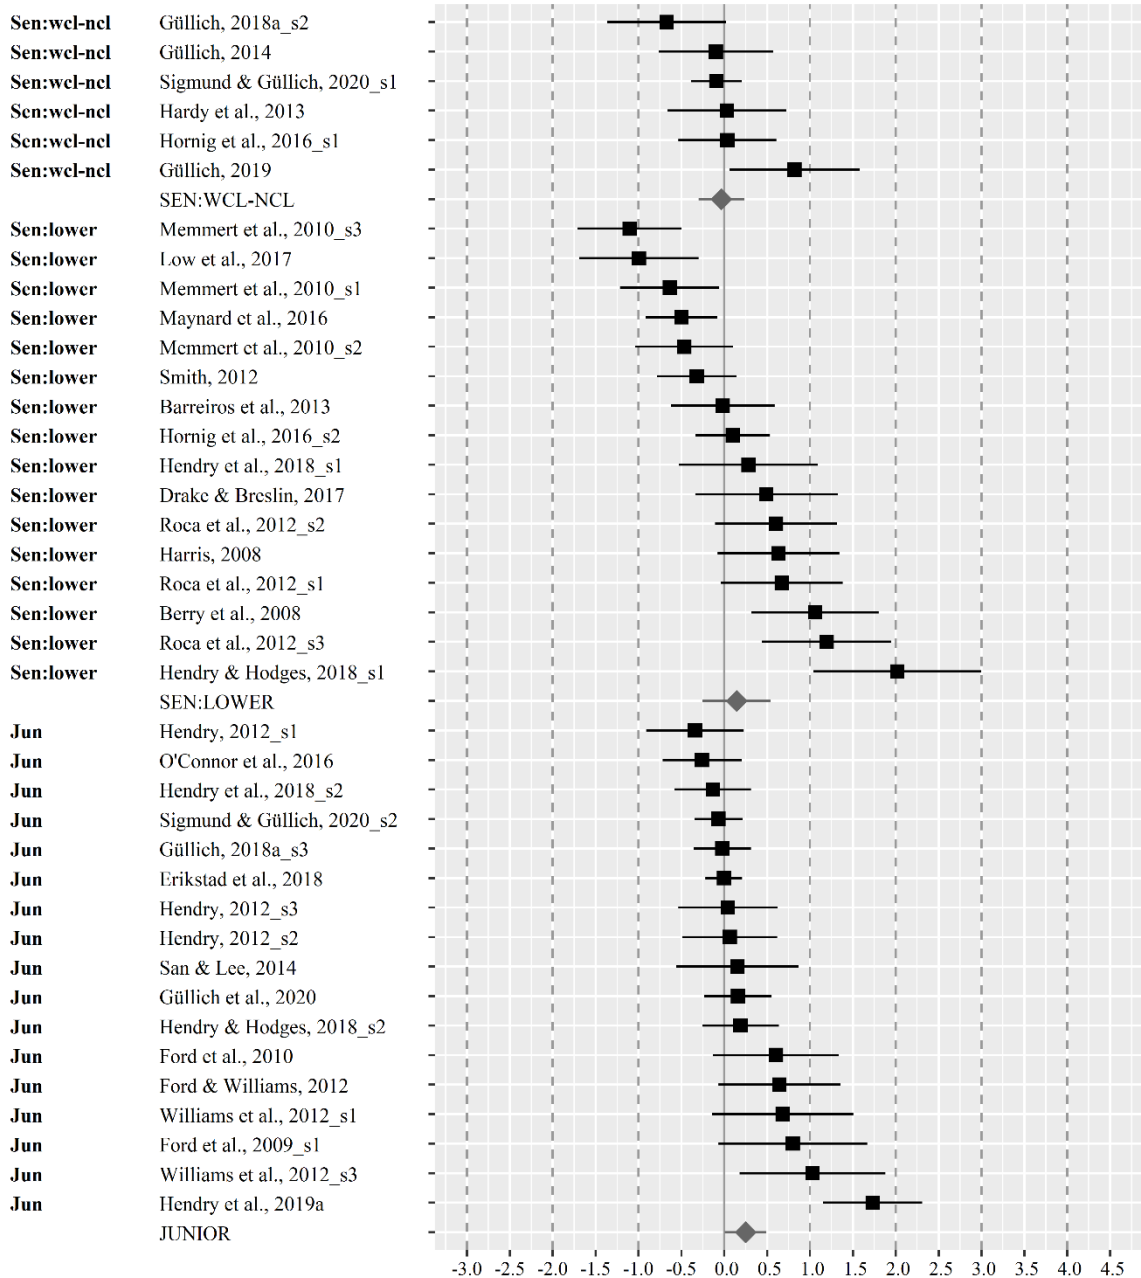

**Figure S4.** Main-sport peer-led play. Forest plot depicting each effect size (squares) and its 95% confidence interval (lines) entered into the meta-analytic model for differences between relatively higher and lower skilled athletes, along with the meta-analytic mean effect size overall and for junior athletes and senior athletes (diamonds). \_s# refers to independent samples. Senior world-class vs. national-class athletes (Sen:wcl-ncl)  $I^2=40.39$ , Senior lower-level (Sen:lower)  $I^2=75.97$ , Junior (Jun)  $I^2=68.10$ .

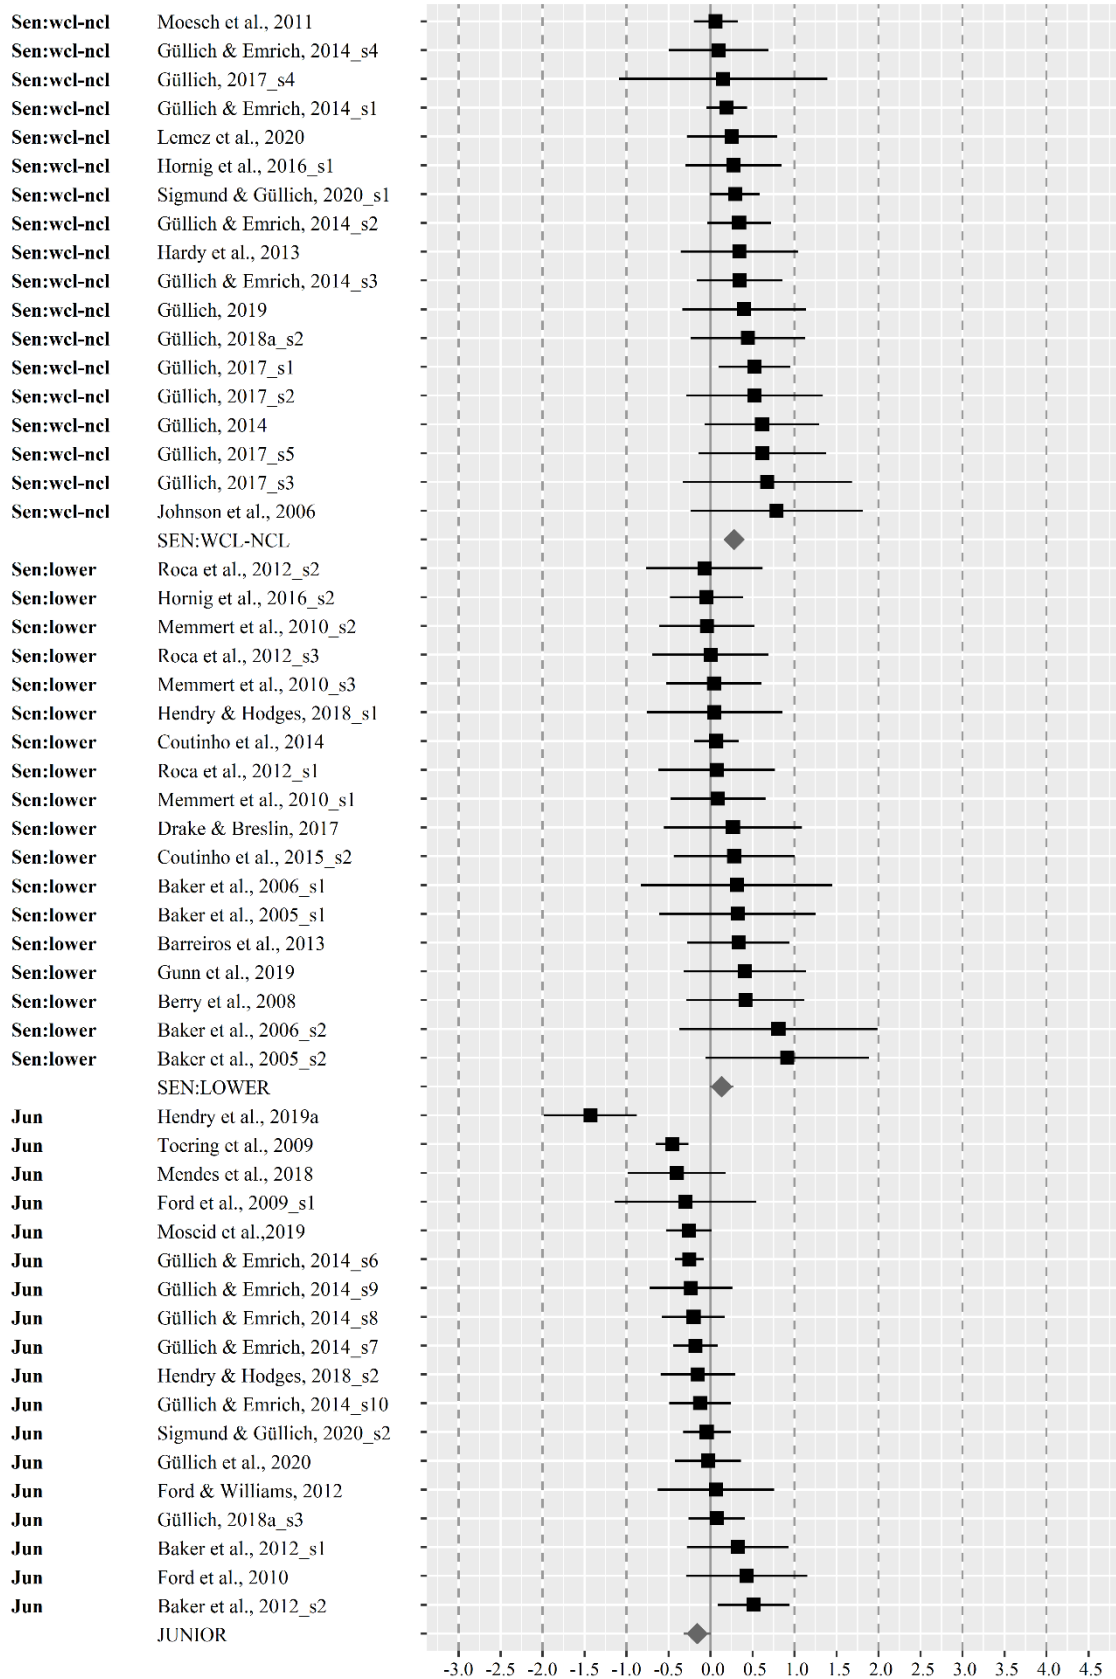

**Figure S5.** Other-sports practice and/or play. Forest plot depicting each effect size (squares) and its 95% confidence interval (lines) entered into the meta-analytic model for differences between relatively higher and lower skilled athletes, along with the meta-analytic mean effect size overall and for junior athletes and senior athletes (diamonds). \_s# refers to independent samples. Senior world-class vs. national-class athletes (Sen:wcl-ncl)  $I^2=0.0$ , Senior lower-level (Sen:lower)  $I^2=0.0$ , Junior (Jun)  $I^2=64.81$ .

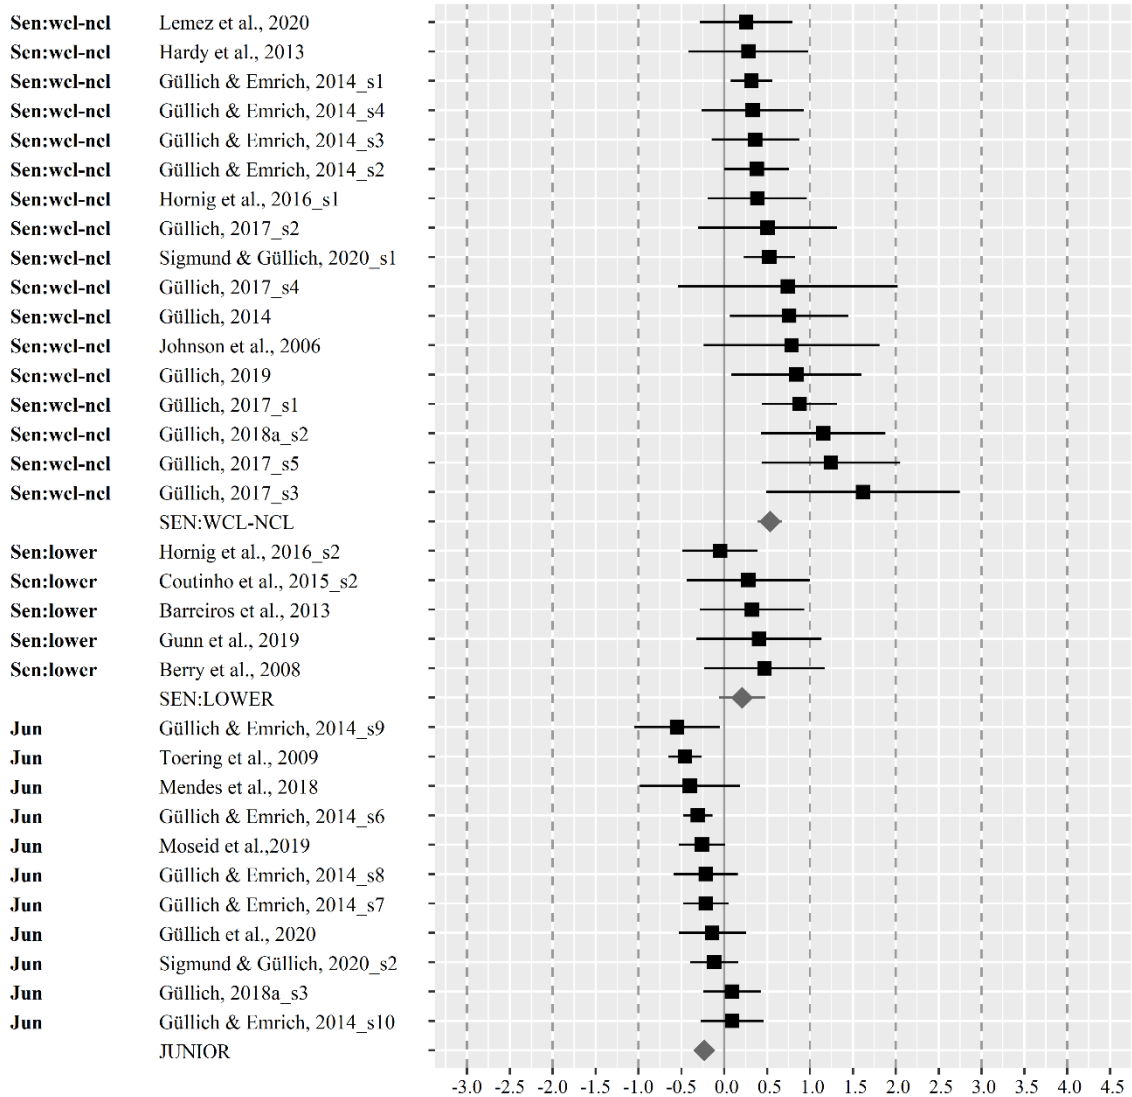

**Figure S6.** Other-sports practice. Forest plot depicting each effect size (squares) and its 95% confidence interval (lines) entered into the meta-analytic model for differences between relatively higher and lower skilled athletes, along with the meta-analytic mean effect size overall and for junior athletes and senior athletes (diamonds). \_s# refers to independent samples. Senior world-class vs. national-class athletes (Sen:wcl-ncl)  $I^2=0.0$ , Senior lower-level (Sen:lower)  $I^2=0.0$ , Junior (Jun)  $I^2=33.69$ .

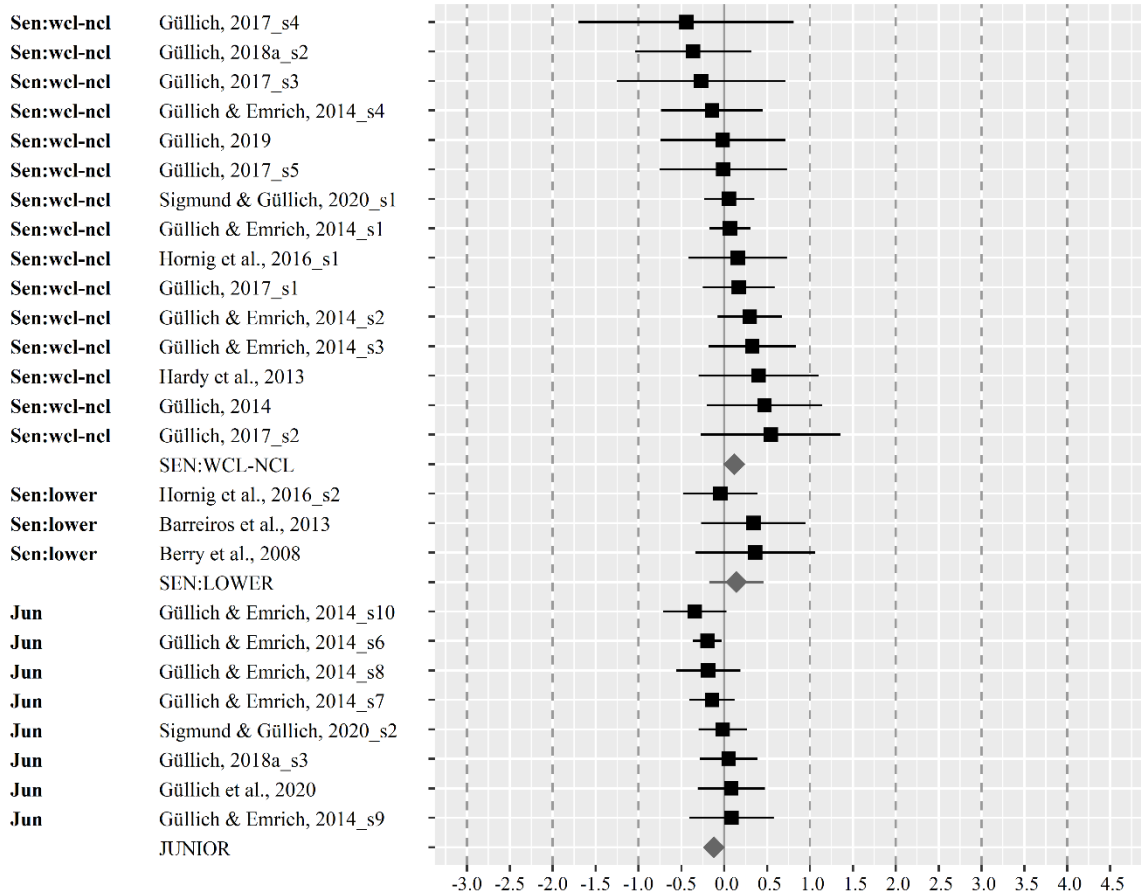

**Figure S7.** Other-sports play. Forest plot depicting each effect size (squares) and its 95% confidence interval (lines) entered into the meta-analytic model for differences between relatively higher and lower skilled athletes, along with the meta-analytic mean effect size overall and for junior athletes and senior athletes (diamonds). *\_s#* refers to independent samples. Senior world-class vs. national-class athletes (Sen:wcl-ncl)  $I^2=0.0$ , Senior lower-level (Sen:lower)  $I^2=0.0$ , Junior (Jun)  $I^2=0.0$ .

## Publication bias analyses

Publication bias occurs when certain types of effects, such as small effects, null effects, or effects that are in the opposite direction to researchers' expectations, are systematically suppressed from publication.

We first examined the funnel plots for each overall model for asymmetry. Funnel plots depict the relationship between standard error and effect size. The smaller the study's standard error, the closer that study's effect size should be to the mean effect. The larger the study's standard error, the more random error it has. Due to its random nature, the study's effect size should have an equally likely chance of being higher or lower than the mean effect size. If a funnel plot is asymmetrical, i. e., if smaller studies (with larger standard error) are "missing" from one side of the plot, those studies might be missing due to publication bias. We also quantified symmetry with Egger's regression (Egger et al., 1997). However, Egger's regression is prone to Type I error when heterogeneity is high (Sterne et al., 2011), as is the case in these meta-analytic models. Thus, Egger's regression results should be interpreted with caution.

As can be seen in Figure S8, the funnel plots are by and large symmetrical. Egger's regression supports this observation for age to reach milestones, main-sport practice, main-sport play, and other-sports practice and/or play. However, Egger's regression was significant, suggesting there could be publication bias, in starting age, other-sports practice, and other-sports play ( $.003 < p < .031$ ). The analyses suggest that associations of higher performance with a *later* starting age or *more* other-sports practice or play in small samples may have been more likely to be published,

We next examined a potential moderator effect of publication status, i. e., whether the mean effect sizes differed between published and unpublished studies. Significant results would suggest that larger (or smaller) effects are more likely to be published. There was no evidence for differences in effect size by publication status (i. e., there was no significant moderation effect of publication status) for any of the predictor variables when considering the entire sample, only juniors, or only seniors ( $0.00 < F < 2.45$ ,  $.126 < p < .967$ ). The results suggest that smaller or larger than average effects were not less likely to be published in this literature.

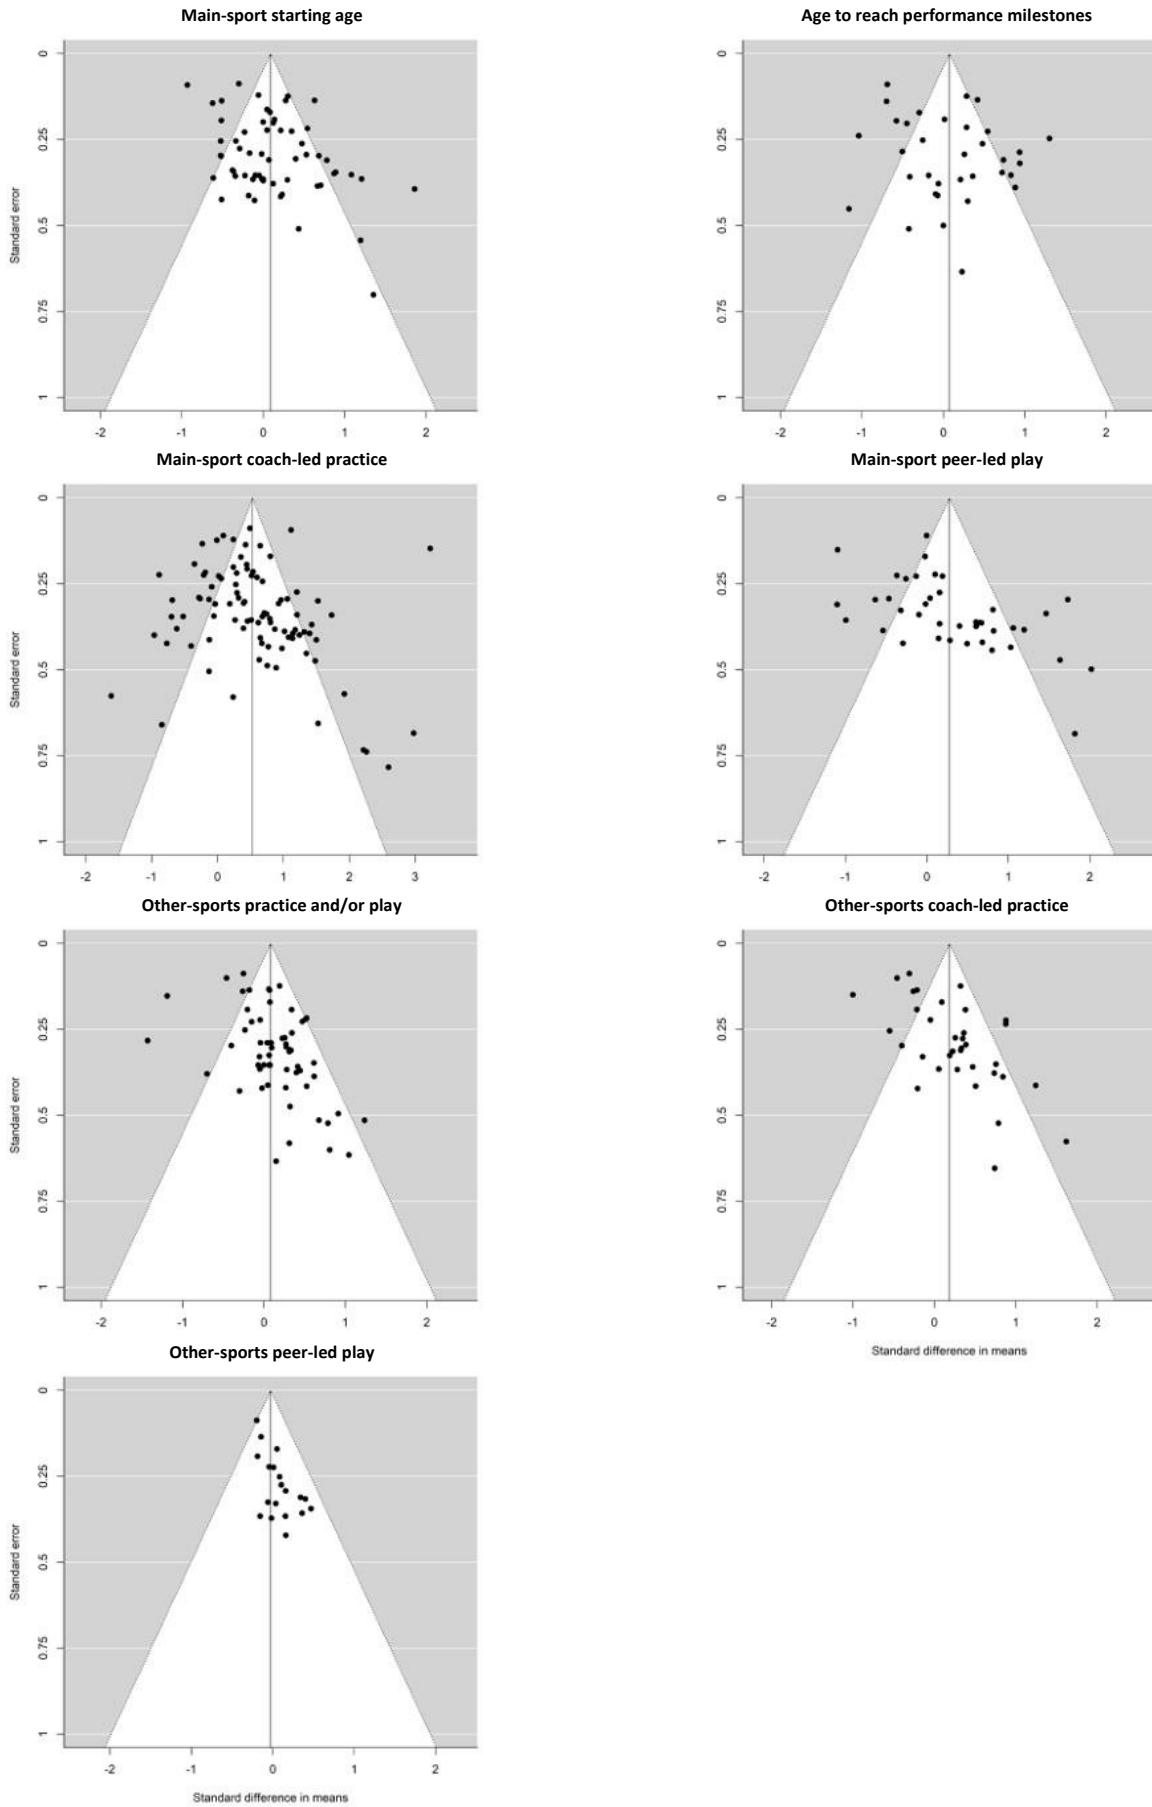

**Figure S8.** Funnel plots for the seven predictors.



Table S2. GRADE rating of the quality of evidence.

|                              | Study design <sup>(a)</sup>     | Consistency         | Directness | Precision           | Quality of evidence <sup>(a)</sup> |
|------------------------------|---------------------------------|---------------------|------------|---------------------|------------------------------------|
| <b>Age of milestones</b>     |                                 |                     |            |                     |                                    |
| Junior performance           | moderate                        | high                | high       | high                | moderate                           |
| Senior performance           | moderate                        | high                | high       | high                | moderate                           |
| Senior WC1 vs. NCI           | moderate to high <sup>(b)</sup> | high                | high       | high                | moderate to high                   |
| Junior vs. senior            | moderate                        | high                | high       | high                | moderate                           |
| <b>Starting age</b>          |                                 |                     |            |                     |                                    |
| Junior performance           | moderate                        | high                | high       | high                | moderate                           |
| Senior performance           | moderate                        | high                | high       | high                | moderate                           |
| Senior WC1 vs. NCI           | moderate to high <sup>(b)</sup> | high                | high       | high                | moderate to high                   |
| Junior vs. senior            | moderate                        | high                | high       | high                | moderate                           |
| <b>Main-sport practice</b>   |                                 |                     |            |                     |                                    |
| Junior performance           | moderate                        | high                | high       | high                | moderate                           |
| Senior performance           | moderate                        | high <sup>(c)</sup> | high       | high                | moderate                           |
| Senior WC1 vs. NCI           | moderate to high <sup>(b)</sup> | high                | high       | high                | moderate to high                   |
| Junior vs. senior            | moderate                        | high                | high       | high                | moderate                           |
| <b>Main-sport play</b>       |                                 |                     |            |                     |                                    |
| Junior performance           | low                             | low                 | high       | high                | low                                |
| Senior performance           | low                             | low                 | high       | high                | low                                |
| Senior WC1 vs. NCI           | low                             | low                 | high       | moderate            | low                                |
| Junior vs. senior            | low                             | low                 | high       | high                | low                                |
| <b>Other-sports practice</b> |                                 |                     |            |                     |                                    |
| Junior performance           | moderate                        | high                | high       | high                | moderate                           |
| Senior performance           | moderate                        | high                | high       | high                | moderate                           |
| Senior WC1 vs. NCI           | moderate to high <sup>(b)</sup> | high                | high       | high                | moderate to high                   |
| Junior vs. senior            | moderate                        | high                | high       | high                | moderate                           |
| <b>Other-sports play</b>     |                                 |                     |            |                     |                                    |
| Junior performance           | low                             | low                 | high       | high <sup>(d)</sup> | low                                |
| Senior performance           | low                             | low                 | high       | high                | low                                |
| Senior WC1 vs. NCI           | low to moderate <sup>(b)</sup>  | low                 | high       | high                | low                                |
| Junior vs. senior            | low                             | low                 | high       | high <sup>(d)</sup> | low                                |

<sup>(a)</sup> Dose-response gradient for all predictor variables except main-sport play and other-sports play. <sup>(b)</sup> Several matched-pairs studies with consistent findings. <sup>(c)</sup> When only considering effect of *early* main-sport practice (up to age 15 years) on senior performance, consistency is low. <sup>(d)</sup> When only considering effect of *early* other-sports play (up to age 15 years) on junior performance, precision is low.
